# Supplementary material for: Modular cytokine receptor-targeting chimeras for targeted degradation of cell surface and extracellular proteins
Source: PubMed Central journal article supplement (PMC9931583; doi:10.1038/s41587-022-01456-2), 2022-09-22
Supplement: 41587_2022_1456_MOESM1_ESM.pdf [file 41587_2022_1456_MOESM1_ESM.pdf]

---

**Supplementary information**

---

**Modular cytokine receptor-targeting  
chimeras for targeted degradation of cell  
surface and extracellular proteins**

---

In the format provided by the  
authors and unedited

1 **Supplementary Information for:**

2 **Cytokine-receptor targeting chimeras for targeted degradation of extracellular proteins**

3 **Authors & Affiliations:**

4 Katarina Pance<sup>1,2</sup>, Josef A. Gramespacher<sup>1,2</sup>, James R. Byrnes<sup>1</sup>, Fernando Salangsang<sup>3,4</sup>, Juan-  
5 Antonio C. Serrano<sup>3,4</sup>, Adam D. Cotton<sup>1</sup>, Veronica Steri<sup>3,4</sup>, James A. Wells<sup>1,5\*</sup>

6 <sup>1</sup> *Department of Pharmaceutical Chemistry, University of California San Francisco, San*  
7 *Francisco, California, 94158, USA.*

8 <sup>2</sup> *Current Affiliation: EpiBiologics, Inc., San Carlos, California, 94070, USA.*

9 <sup>3</sup> *Helen Diller Family Comprehensive Cancer Center, University of California San Francisco, San*  
10 *Francisco, California, 94158, USA.*

11 <sup>4</sup> *Preclinical Therapeutics Core, University of California San Francisco, San Francisco,*  
12 *California, 94158, USA.*

13 <sup>5</sup> *Department of Cellular and Molecular Pharmacology, University of California San Francisco,*  
14 *San Francisco, California, 94158, USA.*

15 \* *Corresponding Author: jim.wells@ucsf.edu*

16 **Supplementary Data Table 1: Summary of CXCR7:target ratios and maximal degradation**  
 17 **(D<sub>max</sub>) for each cell surface KineTAC target.**

18

| Target Protein | Cell Line            | CXCR7:Target mRNA Ratio <sup>1</sup> | D <sub>max</sub> (%) |
|----------------|----------------------|--------------------------------------|----------------------|
| PD-L1          | MDA-MB-231           | 0.5                                  | 73                   |
| HER2           | MCF7                 | 8.6                                  | 51                   |
| HER2           | MDA-MB-175VII        | 1.3                                  | 62                   |
| HER2           | SK-BR-3              | 0.03                                 | 26                   |
| EGFR           | HeLa                 | 6.0                                  | 84                   |
| EGFR           | A431                 | 0.4                                  | 54                   |
| EGFR           | MDA-MB-231           | 0.2                                  | 66                   |
| EGFR           | NCI-H292             | 0.1                                  | 74                   |
| EGFR           | A549                 | 0.2                                  | 72                   |
| EGFR           | NCI-H358             | 0.04                                 | 79                   |
| EGFR           | HCC827               | 0.0004                               | N/A                  |
| PD-1           | Primary CD8+ T cells | N/A                                  | 82                   |
| CDCP1          | HeLa                 | 5.6                                  | 94                   |
| TROP2          | MCF7                 | 1.8                                  | 51                   |

19 <sup>1</sup>mRNA levels are from the Cancer Cell Line Encyclopedia RNA-seq of 934 cancer cell lines and Genentech's RNA-  
 20 seq of 675 commonly used human cancer cells.

21 **Supplementary Data Table 2: *In vitro* binding affinities of atezolizumab alanine mutants to**  
22 **PD-L1.**

23

| <b>Mutant</b> | <b>K<sub>D</sub> (nM)</b> | <b>k<sub>on</sub> (M<sup>-1</sup>s<sup>-1</sup>)</b> | <b>k<sub>off</sub> (s<sup>-1</sup>)</b> |
|---------------|---------------------------|------------------------------------------------------|-----------------------------------------|
| WT            | 0.33                      | 1.87 x 10 <sup>5</sup>                               | 6.24 x 10 <sup>-5</sup>                 |
| S57A HC       | 0.52                      | 2.53 x 10 <sup>5</sup>                               | 1.31 x 10 <sup>-4</sup>                 |
| D31A HC       | 4.93                      | 1.10 x 10 <sup>5</sup>                               | 5.44 x 10 <sup>-4</sup>                 |
| S30A HC       | 1.40                      | 4.36 x 10 <sup>4</sup>                               | 6.09 x 10 <sup>-5</sup>                 |
| W33A HC       | N.D.                      | N.D.                                                 | N.D.                                    |
| W50A HC       | 63.1                      | 1.38 x 10 <sup>5</sup>                               | 8.69 x 10 <sup>-3</sup>                 |
| W101A HC      | 458                       | 1.10 x 10 <sup>4</sup>                               | 5.02 x 10 <sup>-3</sup>                 |
| S30A LC       | 1.23                      | 8.48 x 10 <sup>4</sup>                               | 1.05 x 10 <sup>-4</sup>                 |
| Y93A LC       | 5.12                      | 2.16 x 10 <sup>5</sup>                               | 1.10 x 10 <sup>-3</sup>                 |
| L92A LC       | 2.73                      | 2.88 x 10 <sup>5</sup>                               | 7.86 x 10 <sup>-4</sup>                 |

24

25 **Representative Flow Cytometry Gating Strategy: VEGF uptake in HeLa cells**

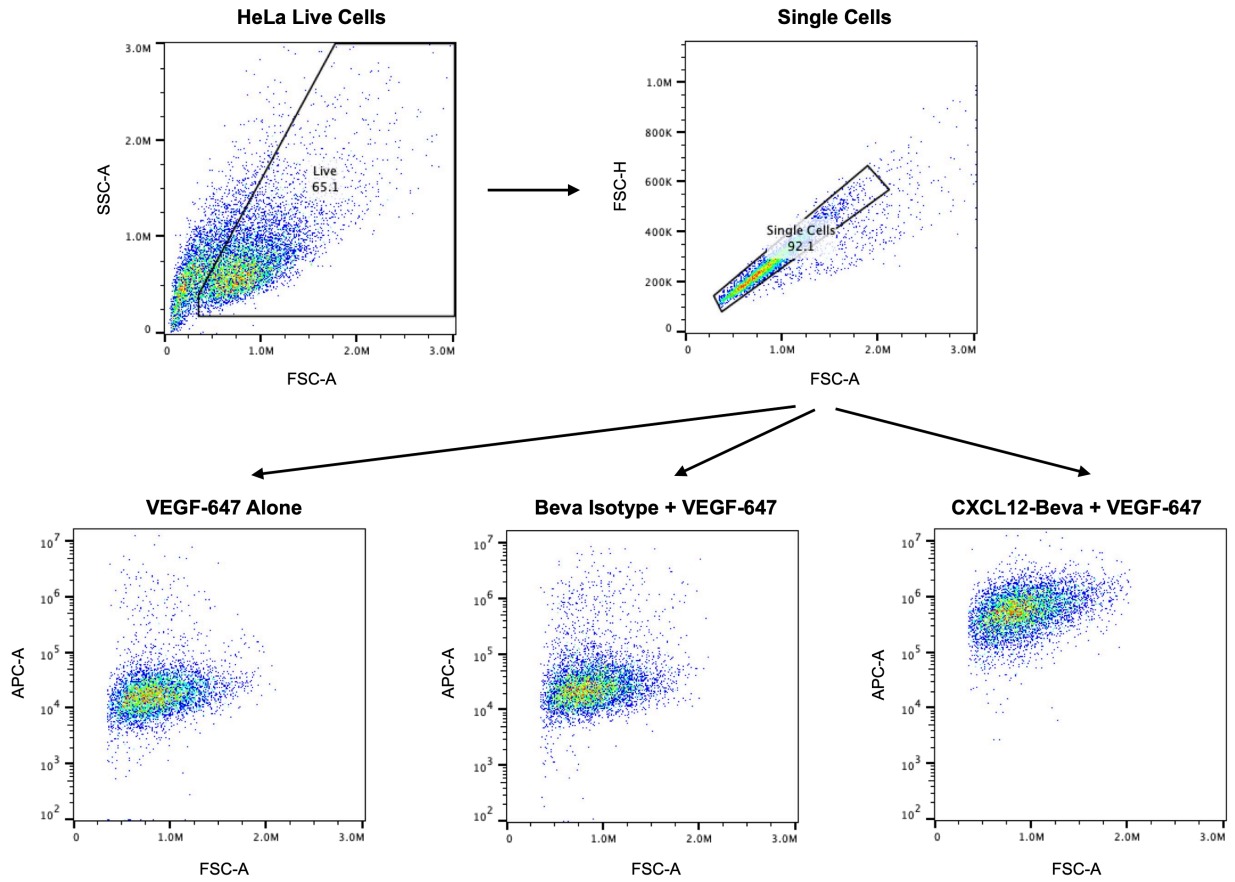

26

27 **Antibodies and Detection Reagents**

| Antibody                           | Source (Cat. #)                      | Usage, Dilution |
|------------------------------------|--------------------------------------|-----------------|
| Rabbit anti-PD-L1                  | Cell Signaling Technologies (13684S) | WB, 1:1000      |
| Rabbit anti-PD-L1 (mouse reactive) | Cell Signaling Technologies (60475S) | WB, 1:1000      |
| Rabbit anti-EGFR                   | Cell Signaling Technologies (4267S)  | WB, 1:1000      |
| Rabbit anti-HER2                   | Cell Signaling Technologies (4290S)  | WB, 1:1000      |
| Rabbit anti-CDCP1                  | Cell Signaling Technologies (13794S) | WB, 1:1000      |
| Rabbit anti-TROP2                  | Cell Signaling Technologies (E8Y8S)  | WB, 1:1000      |
| Rabbit anti-PD-1                   | Cell Signaling Technologies (86163S) | WB, 1:1000      |
| Mouse anti-Tubulin                 | Cell Signaling Technologies (3873S)  | WB, 1:1600      |

|                                                |                                      |                      |
|------------------------------------------------|--------------------------------------|----------------------|
| Mouse anti- $\beta$ -Actin                     | Cell Signaling Technologies (3700S)  | WB, 1:1000           |
| Rabbit anti-CXCR7                              | Abcam (ab138509)                     | WB, 1:1000           |
| Rabbit anti-CXCR4                              | Abcam (ab124824)                     | WB, 1:1000           |
| 680RD Goat anti-Mouse IgG                      | LI-COR (926-68070)                   | WB, 1:10000          |
| 800CW Goat anti-Rabbit IgG                     | LI-COR (926-32211)                   | WB, 1:10000          |
| 800CW Goat anti-Human IgG                      | LI-COR (926-32232)                   | WB, 1:10000          |
| HRP anti-Rabbit IgG                            | Cell Signaling Technologies (7074A)  | WB, 1:2000           |
| Rabbit anti-PD-L1 Alexa 488 Conjugate          | Cell Signaling Technologies (25048S) | IF, 1:50             |
| Rabbit anti-EGFR Alexa 488 Conjugate           | Cell Signaling Technologies (5616S)  | IF, 1:100            |
| Rabbit anti-EGFR Alexa 647 Conjugate           | Cell Signaling Technologies (5588S)  | IF, 1:50             |
| Rabbit anti-LAMP1 Alexa 647 Conjugate          | Cell Signaling Technologies (73589S) | IF, 1:50             |
| Rabbit anti-Rab7 Alexa 647 Conjugate           | Cell Signaling Technologies (94298S) | IF, 1:50             |
| Rabbit anti-GM130 Alexa 647 Conjugate          | Cell Signaling Technologies (59890S) | IF, 1:50             |
| Rabbit anti-PD-L1 Alexa 647 Conjugate          | Cell Signaling Technologies (41726S) | FC, 1:50; IF, 1:400  |
| Anti-CD25 APC Conjugate                        | BioLegend (302610)                   | FC, 1:25             |
| Anti-PD-1 PE Conjugate                         | BioLegend (329906)                   | FC, 1:25             |
| Anti-CD3 PerCP/Cy5.5 Conjugate                 | BioLegend (300429)                   | FC, 1:25             |
| Anti-CD8 APC/Fire 750 Conjugate                | BioLegend (301066)                   | FC, 1:25             |
| Rabbit IgG Isotype Control Alexa 647 Conjugate | Cell Signaling Technologies (3452S)  | FC, 1:50             |
| Mouse IgG2a Isotype Control PE Conjugate       | BioLegend (400211)                   | FC, 1:25             |
| Mouse IgG1 Isotype Control APC Conjugate       | BioLegend (400119)                   | FC, 1:25             |
| Cetuximab                                      | Selleck Chemicals (A2000)            | Functional           |
| Biotinylated Human TNF-alpha                   | Acro Biosystems (TNA-H82E3)          | Functional           |
| Biotinylated Human VEGF-165                    | Acro Biosystems (VE5-H82Q0)          | Functional           |
| Streptavidin Alexa 647 Conjugate               | Thermo Fisher Scientific (S21374)    | FC, 1:500; IF, 1:500 |
| Streptavidin Alexa 488 Conjugate               | Thermo Fisher Scientific (S11223)    | FC, 1:500; IF, 1:500 |

|                                            |                                     |            |
|--------------------------------------------|-------------------------------------|------------|
| Human IL-2                                 | Gold Biotechnologies (1110-02-1000) | Functional |
| Human IL-15                                | Gold Biotechnologies (1110-15-10)   | Functional |
| Mouse IFN-gamma                            | R&D Systems (485-MI-100/CF)         | Functional |
| Immunocult Human CD3/CD28 T cell Activator | STEMCELL Technologies (10971)       | Functional |
