# Supplementary material for: Modular cytokine receptor-targeting chimeras for targeted degradation of cell surface and extracellular proteins
Source: PubMed Central journal article supplement (PMC9931583; doi:10.1038/s41587-022-01456-2), 2022-09-22

**Figure 1**

**d.**

**PD-L1 blot**

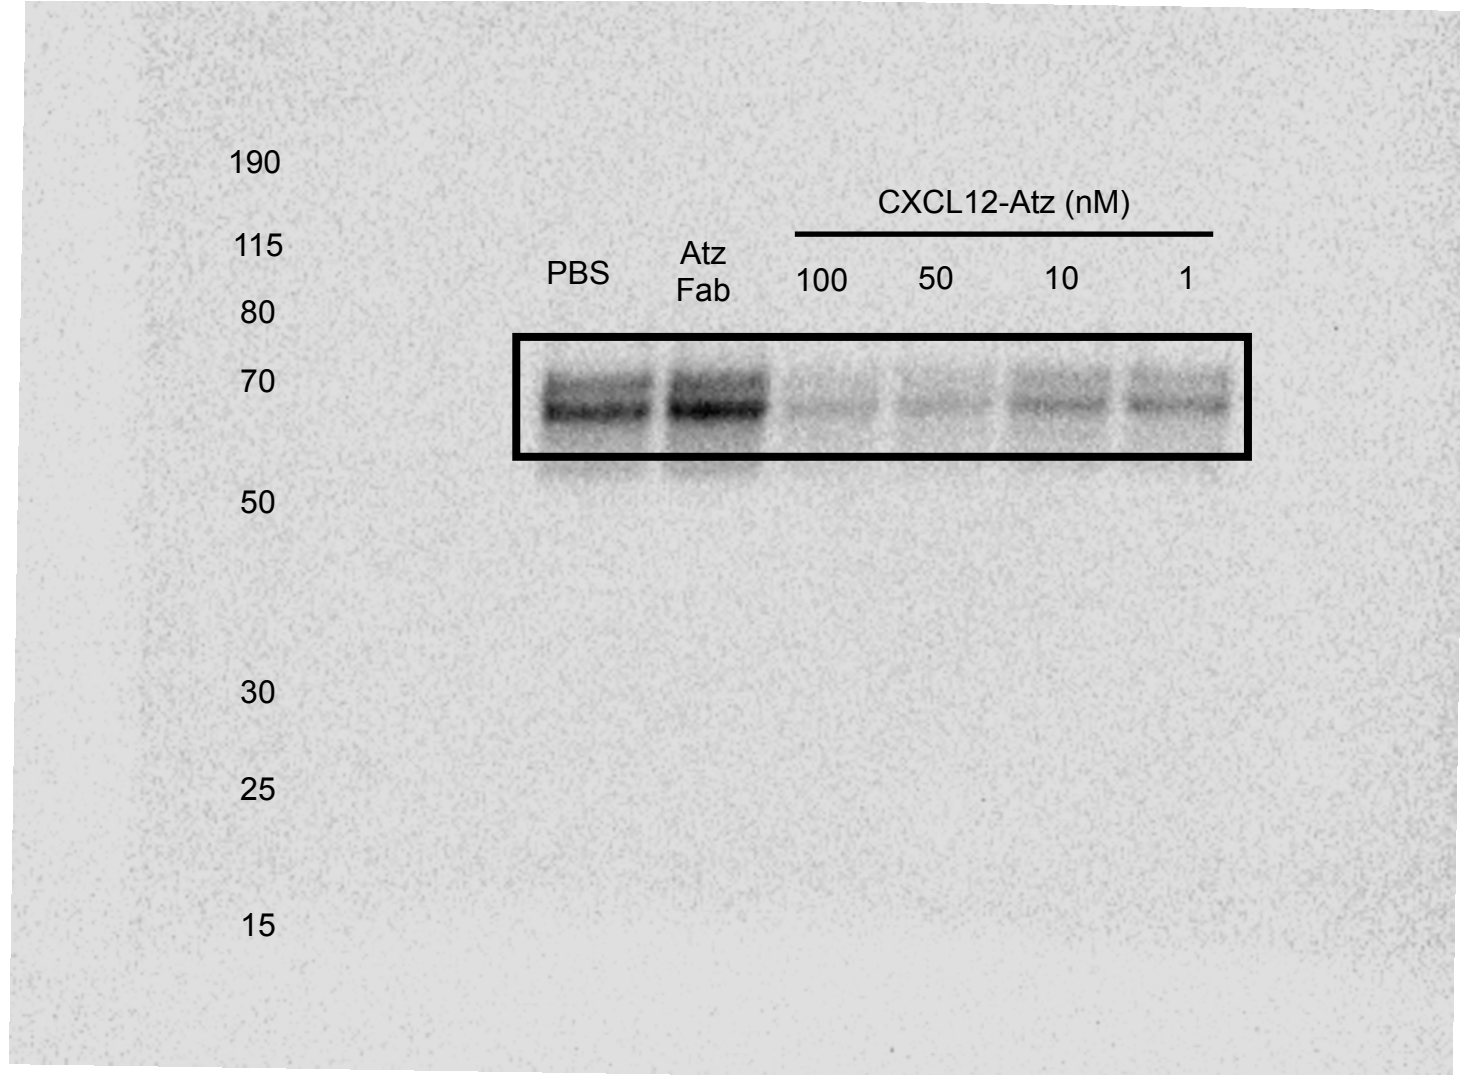

**Tubulin blot**

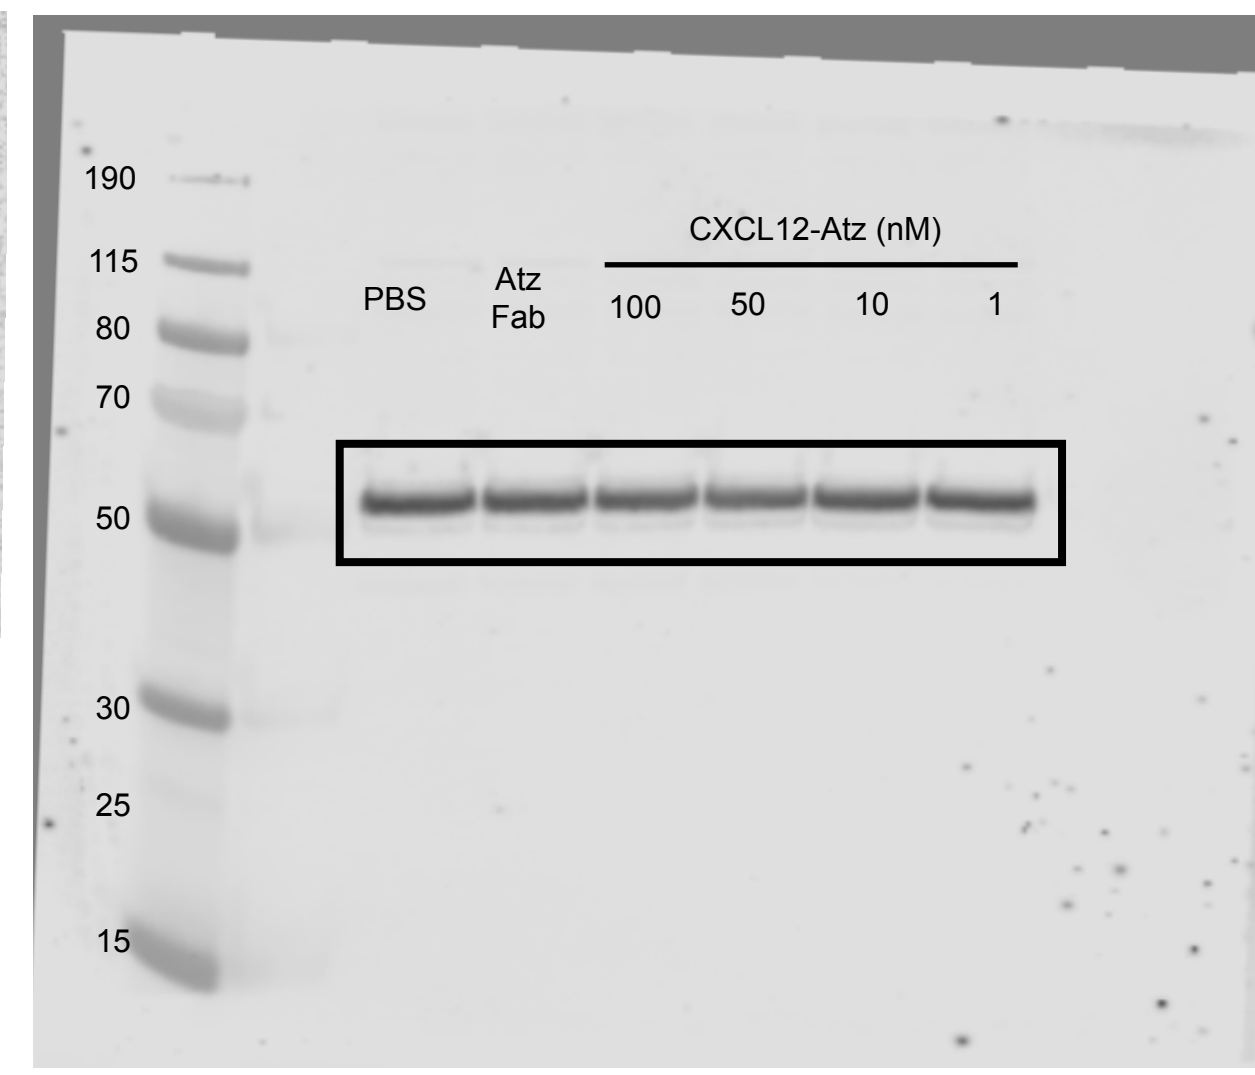

**g.**

**HER2 blot**

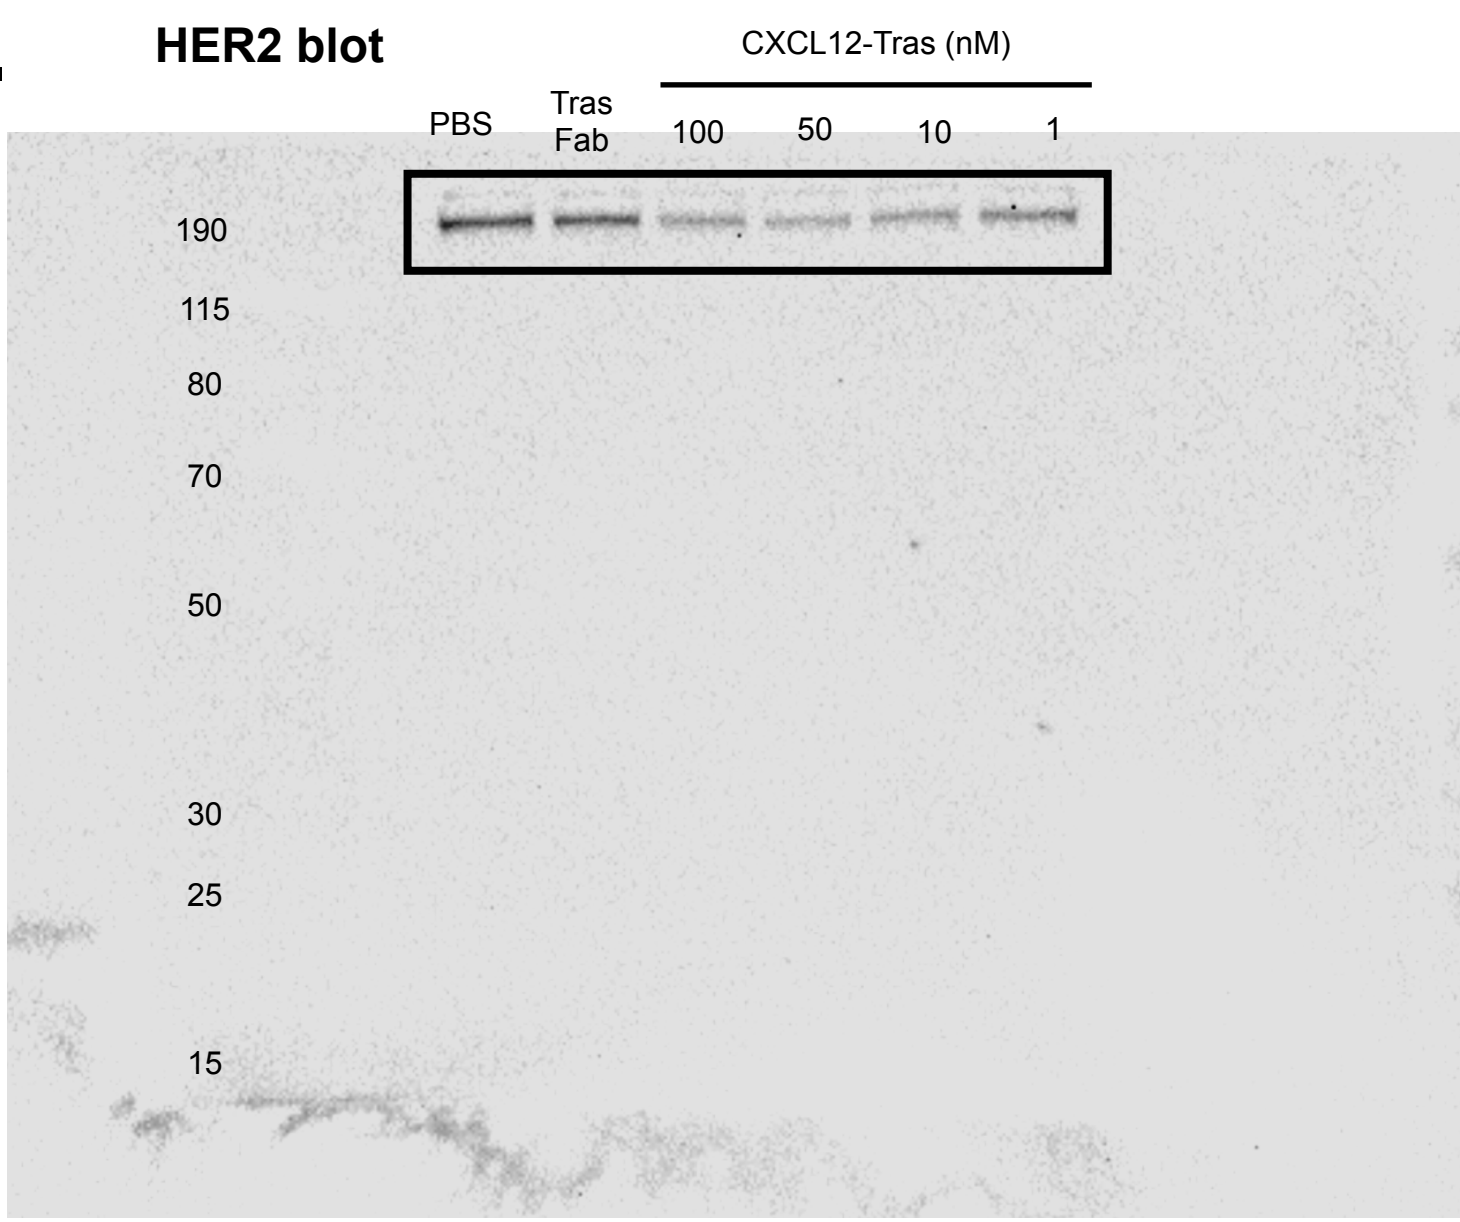

**Tubulin blot**

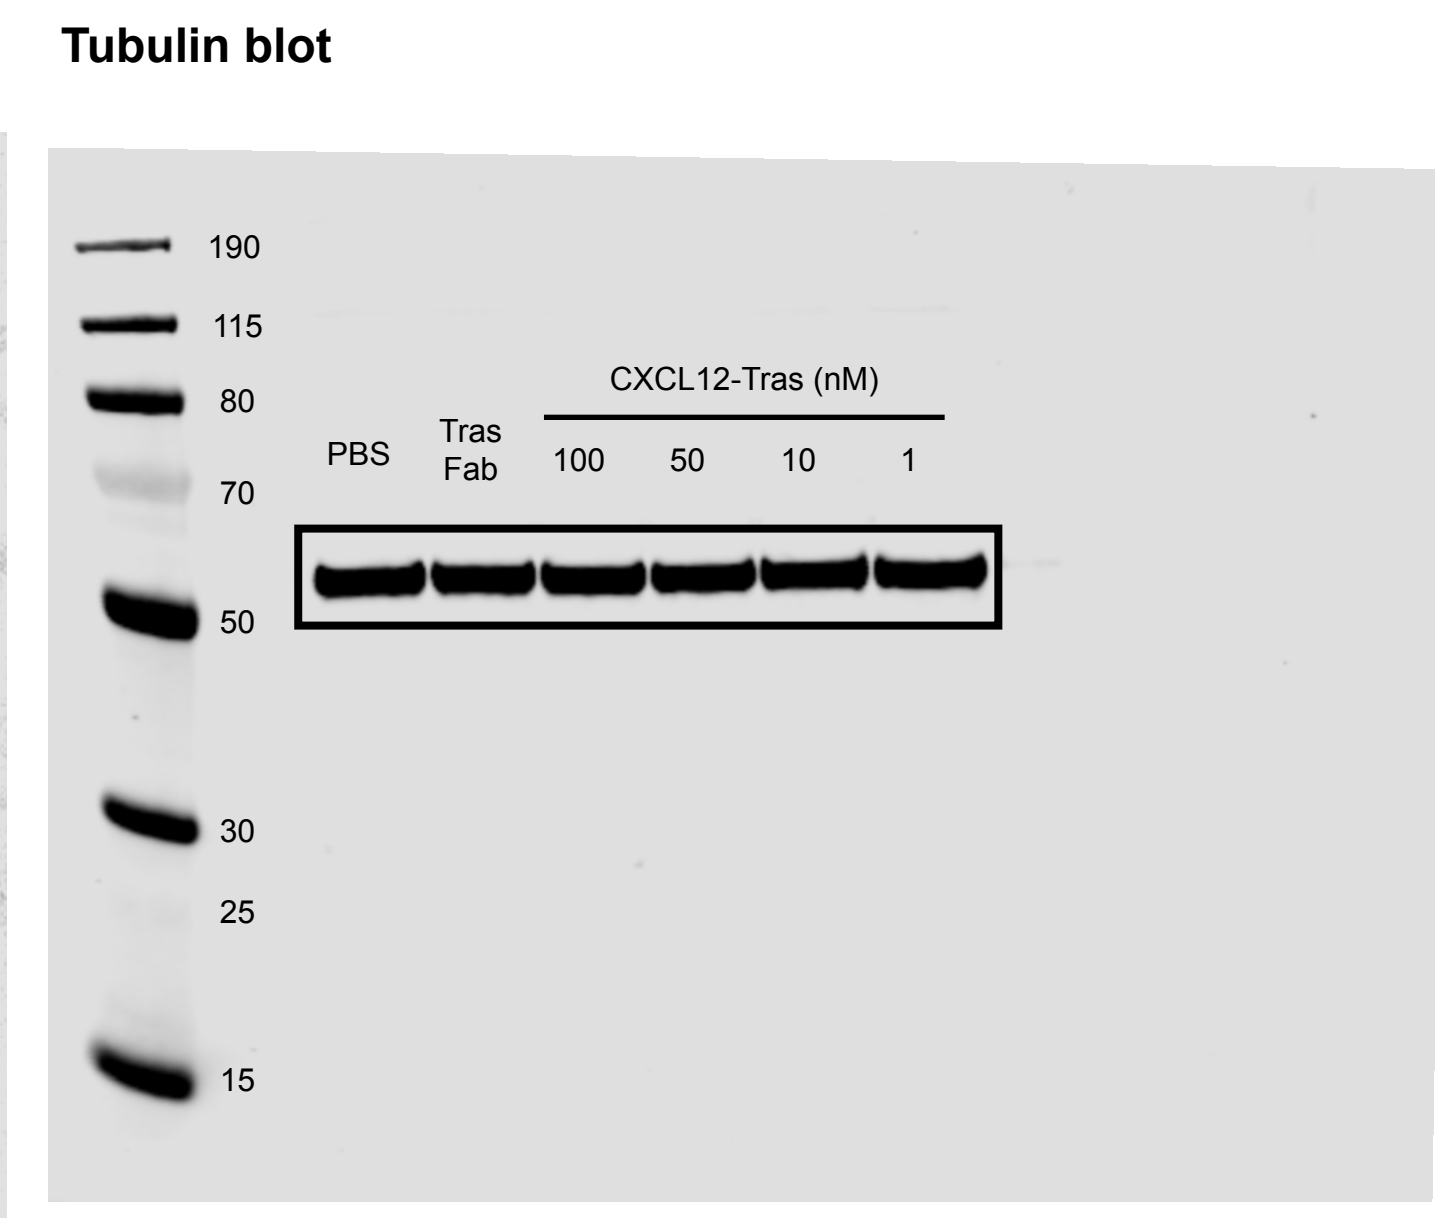

**i.**

**EGFR blot**

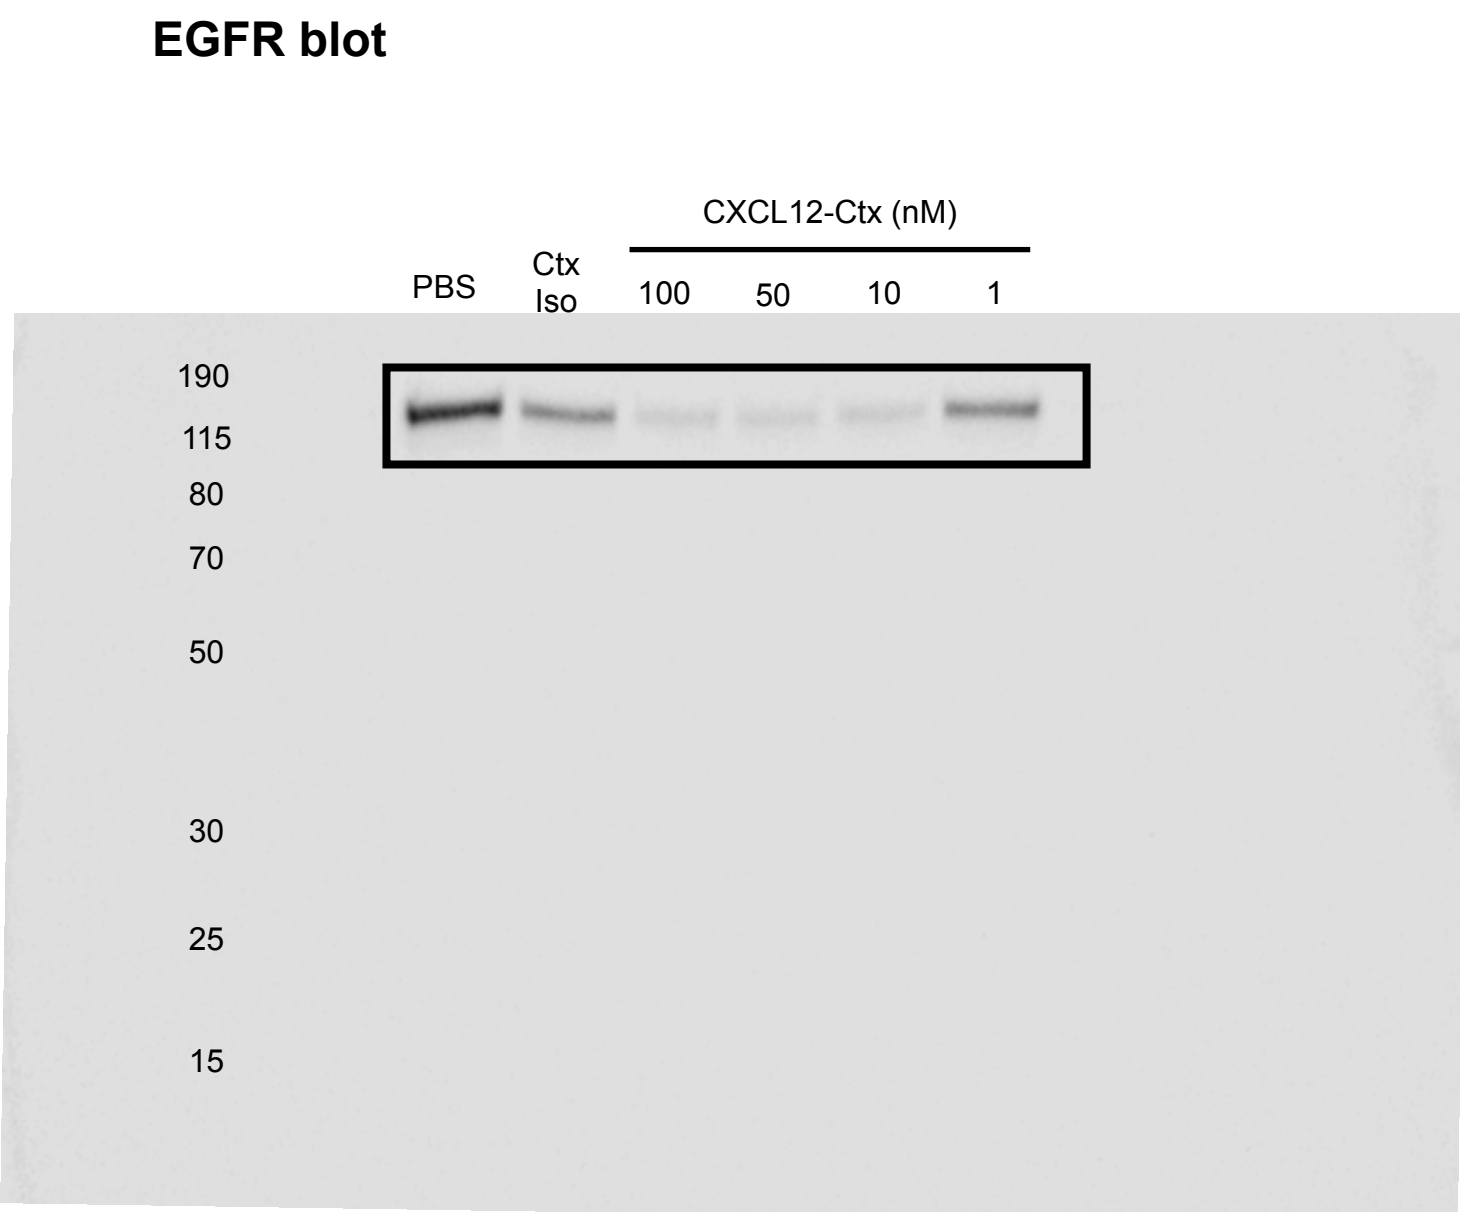

**Tubulin blot**

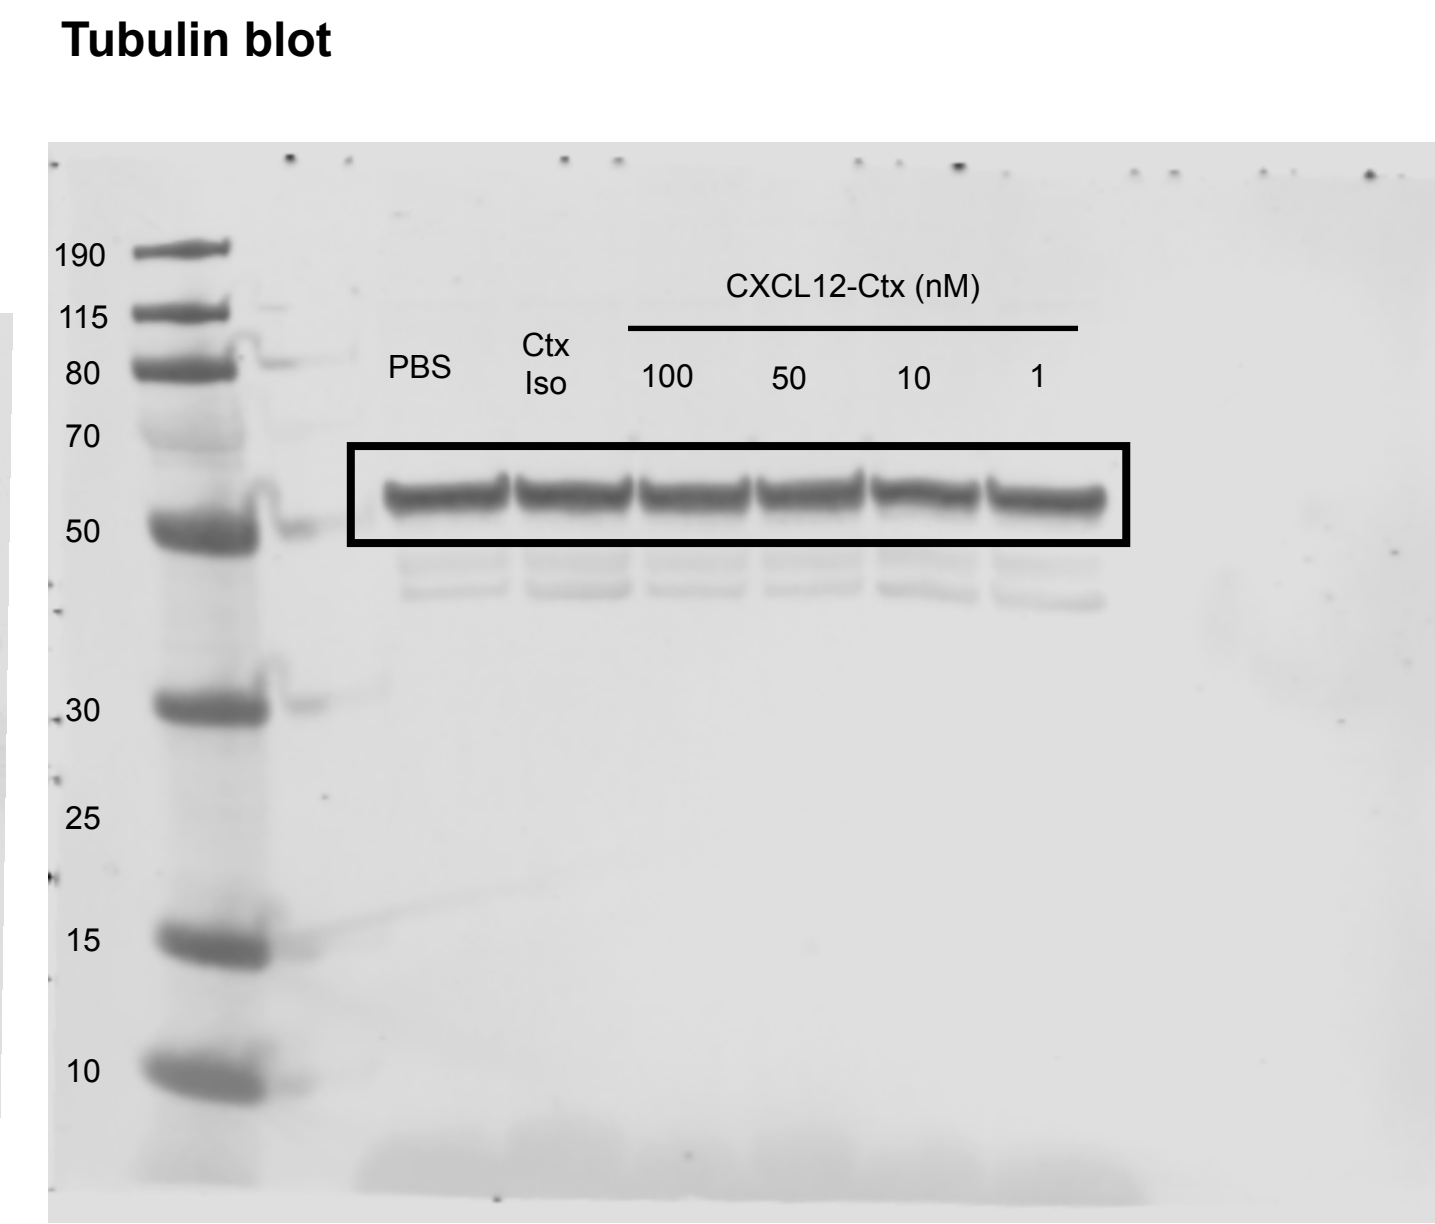

Supplement: 41587_2022_1456_MOESM6_ESM.pdf [file 41587_2022_1456_MOESM6_ESM.pdf]
