# Supplementary material for: Modular cytokine receptor-targeting chimeras for targeted degradation of cell surface and extracellular proteins
Source: PubMed Central journal article supplement (PMC9931583; doi:10.1038/s41587-022-01456-2), 2022-09-22

**Figure 2**

**a.**

**PD-L1 blot**

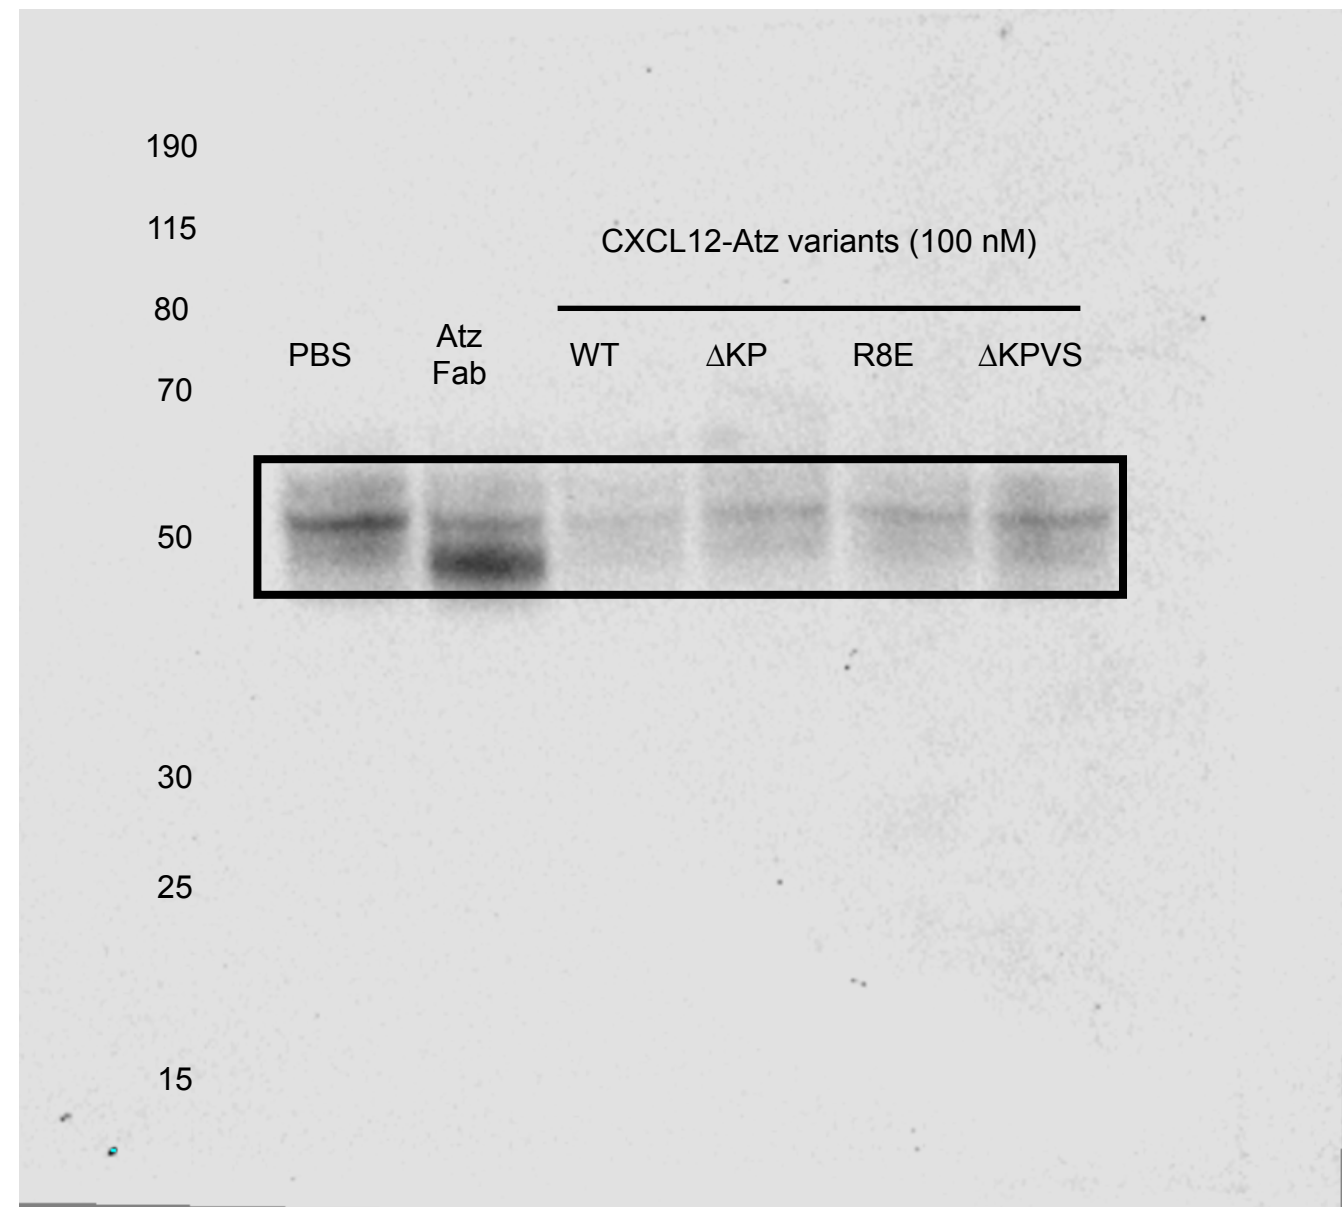

**Tubulin blot**

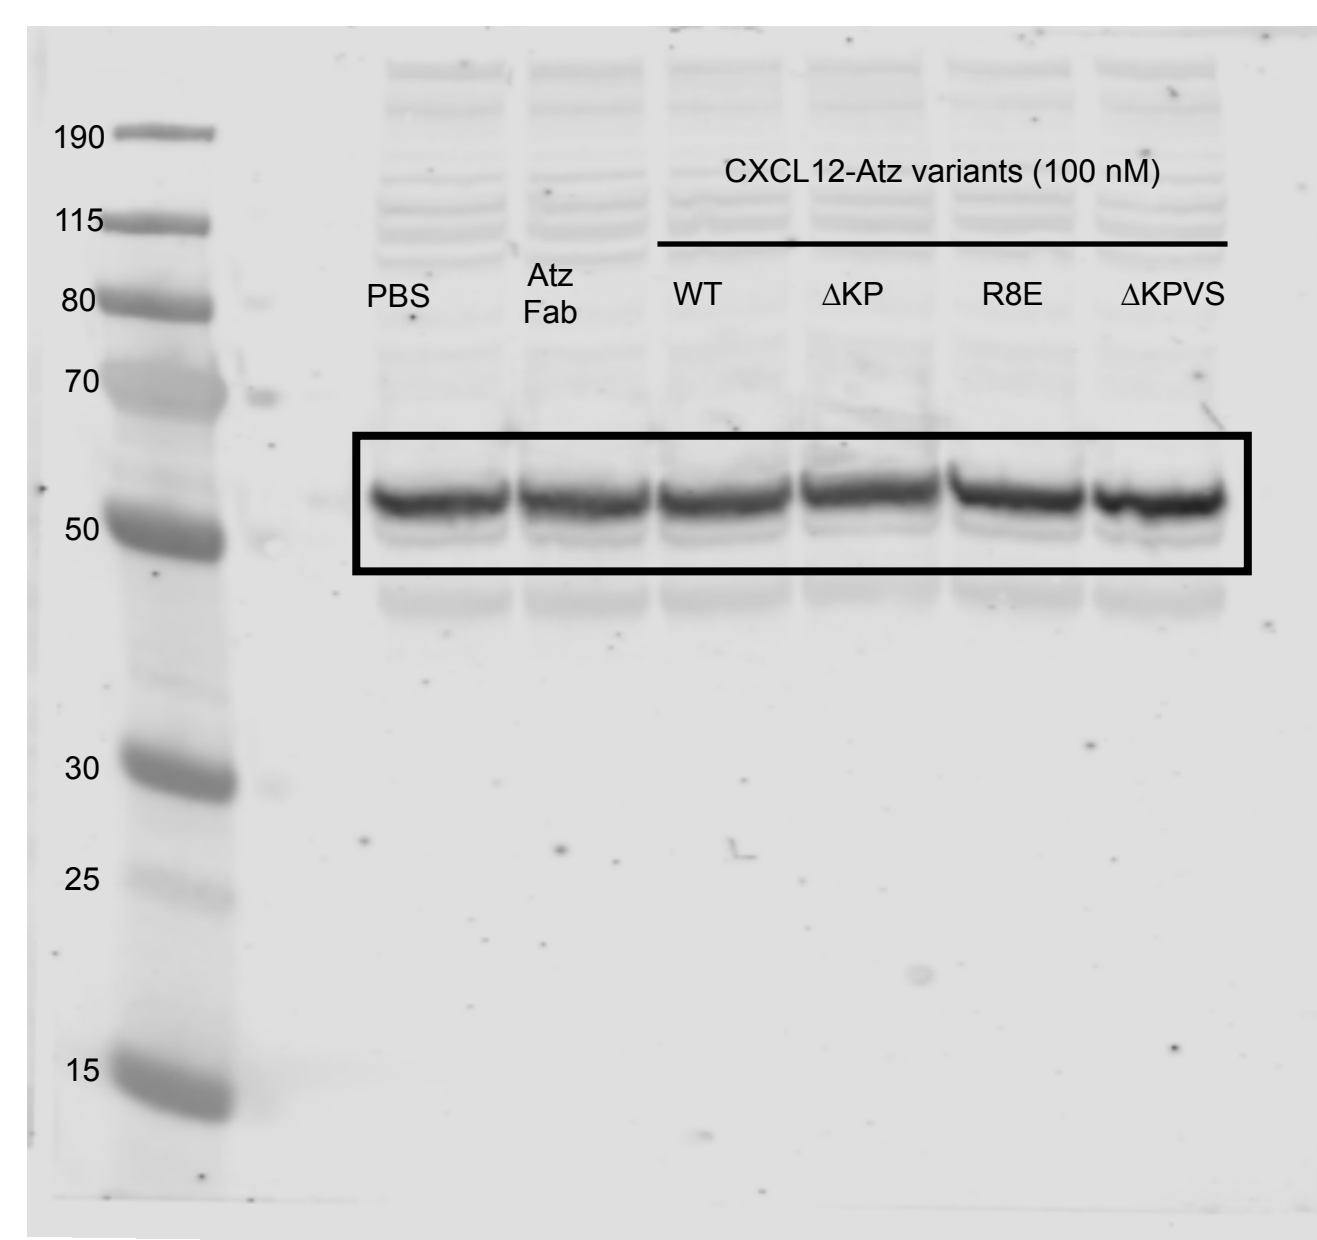

**g.**

**PD-L1 blot**

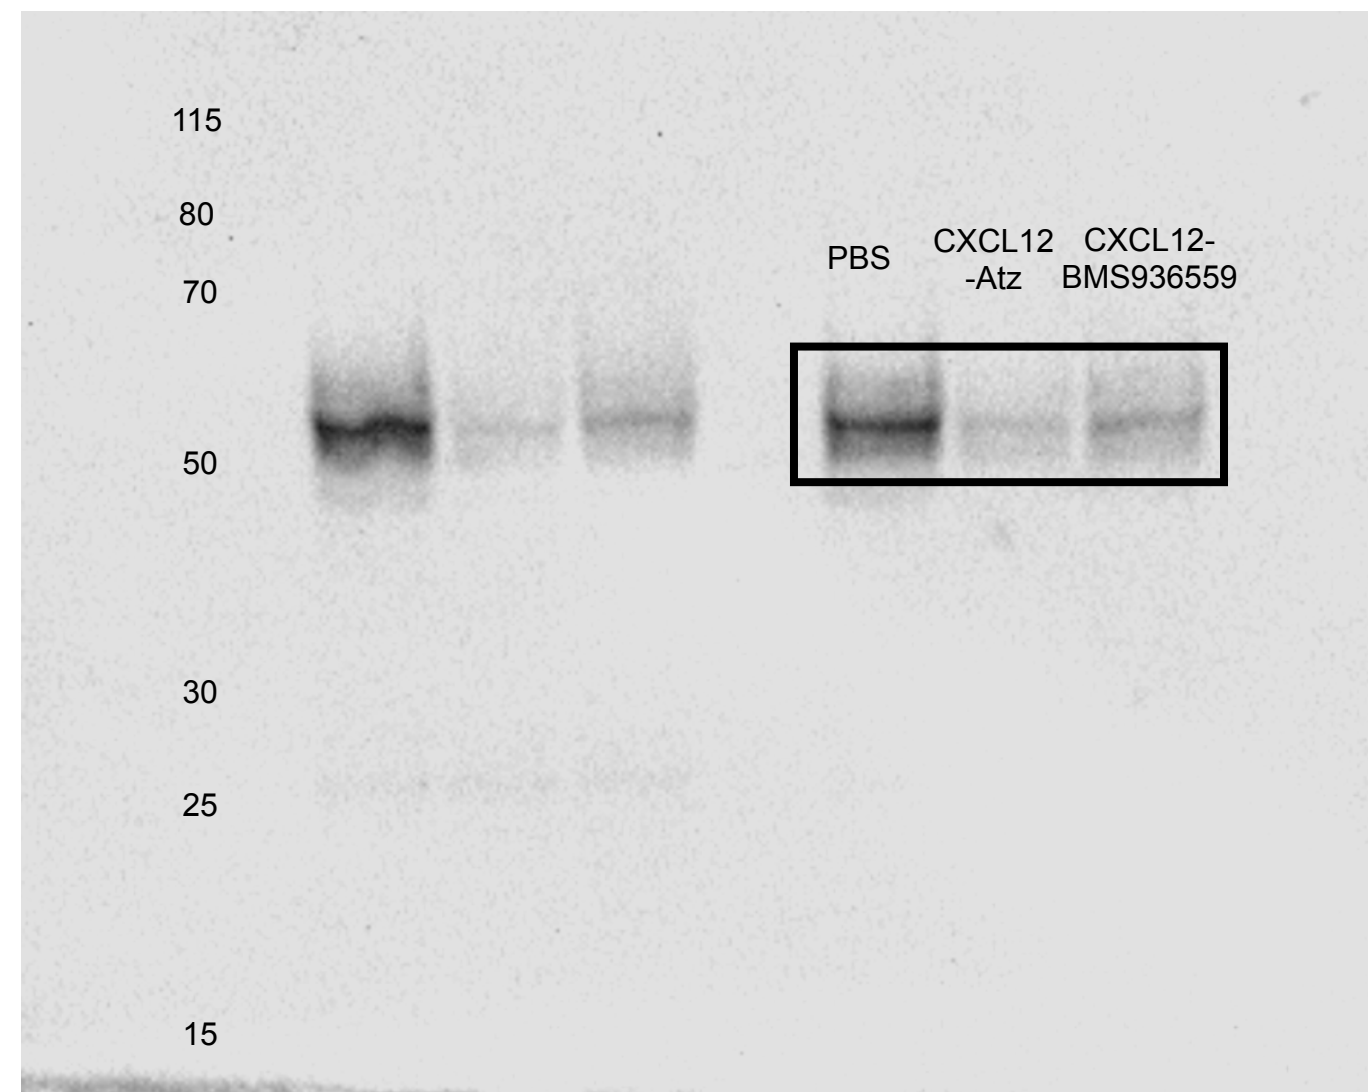

**Tubulin blot**

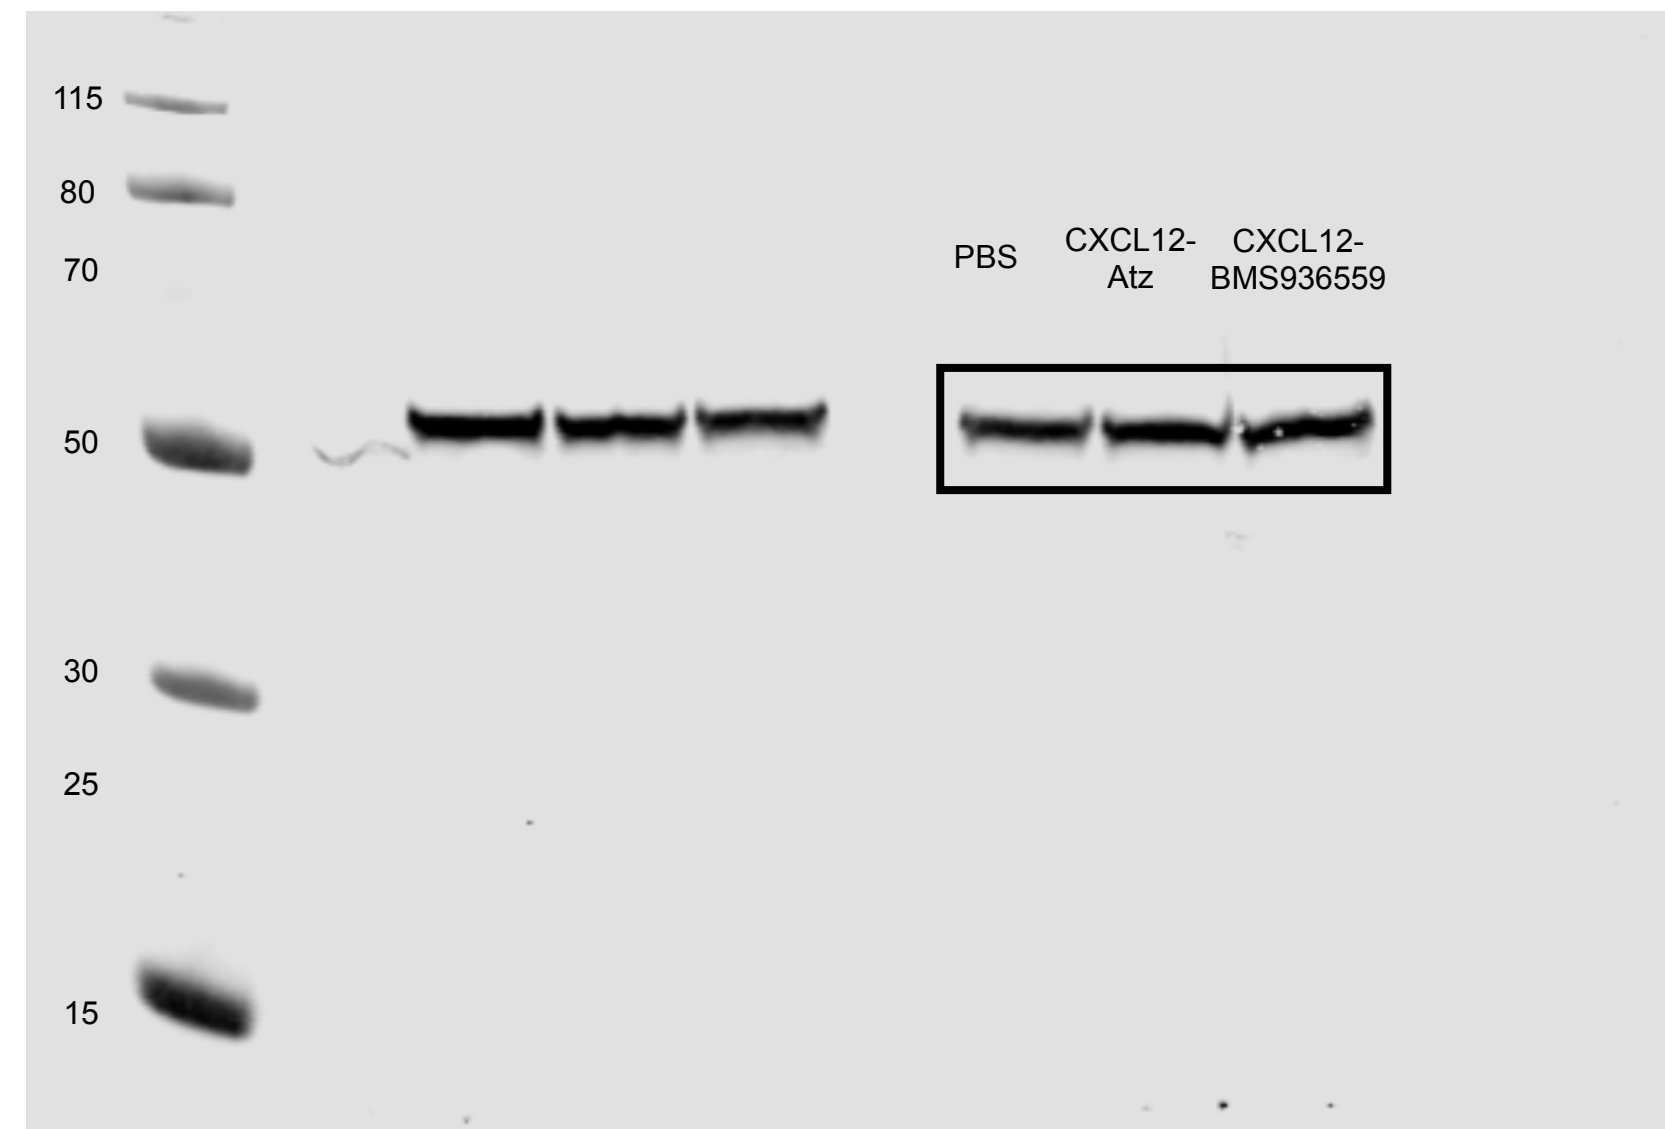

Supplement: 41587_2022_1456_MOESM8_ESM.pdf [file 41587_2022_1456_MOESM8_ESM.pdf]
