# Supplementary material for: Modular cytokine receptor-targeting chimeras for targeted degradation of cell surface and extracellular proteins
Source: PubMed Central journal article supplement (PMC9931583; doi:10.1038/s41587-022-01456-2), 2022-09-22

# Extended Data Figure 1

## a. PD-L1 blot

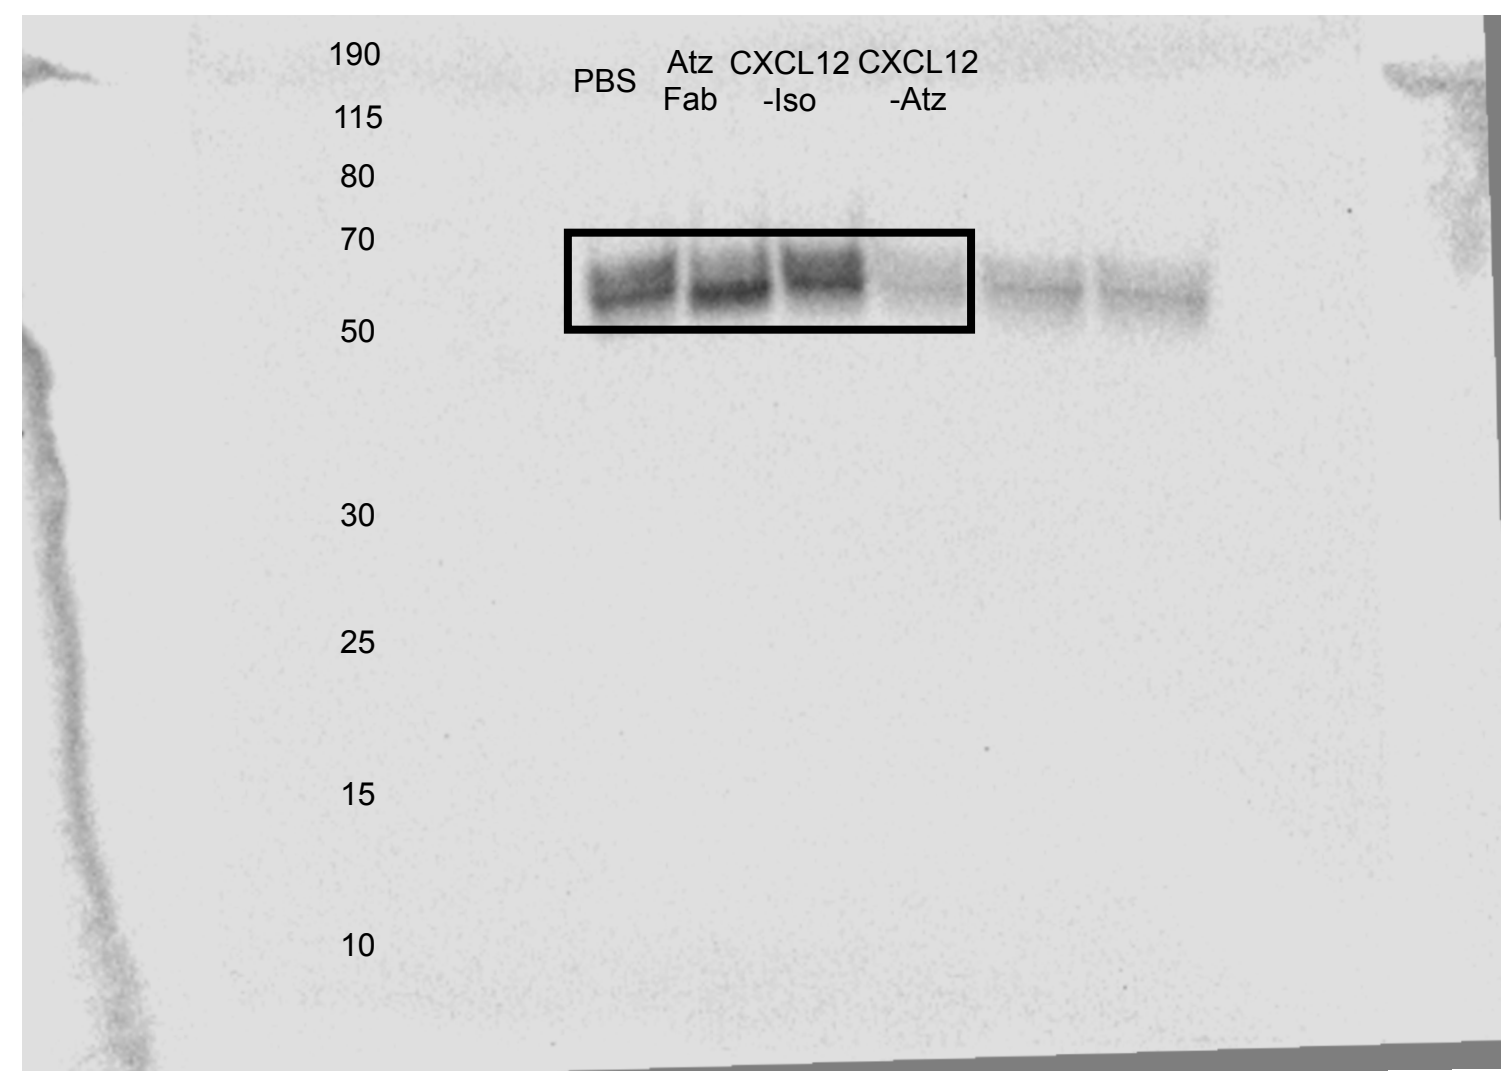

## Tubulin blot

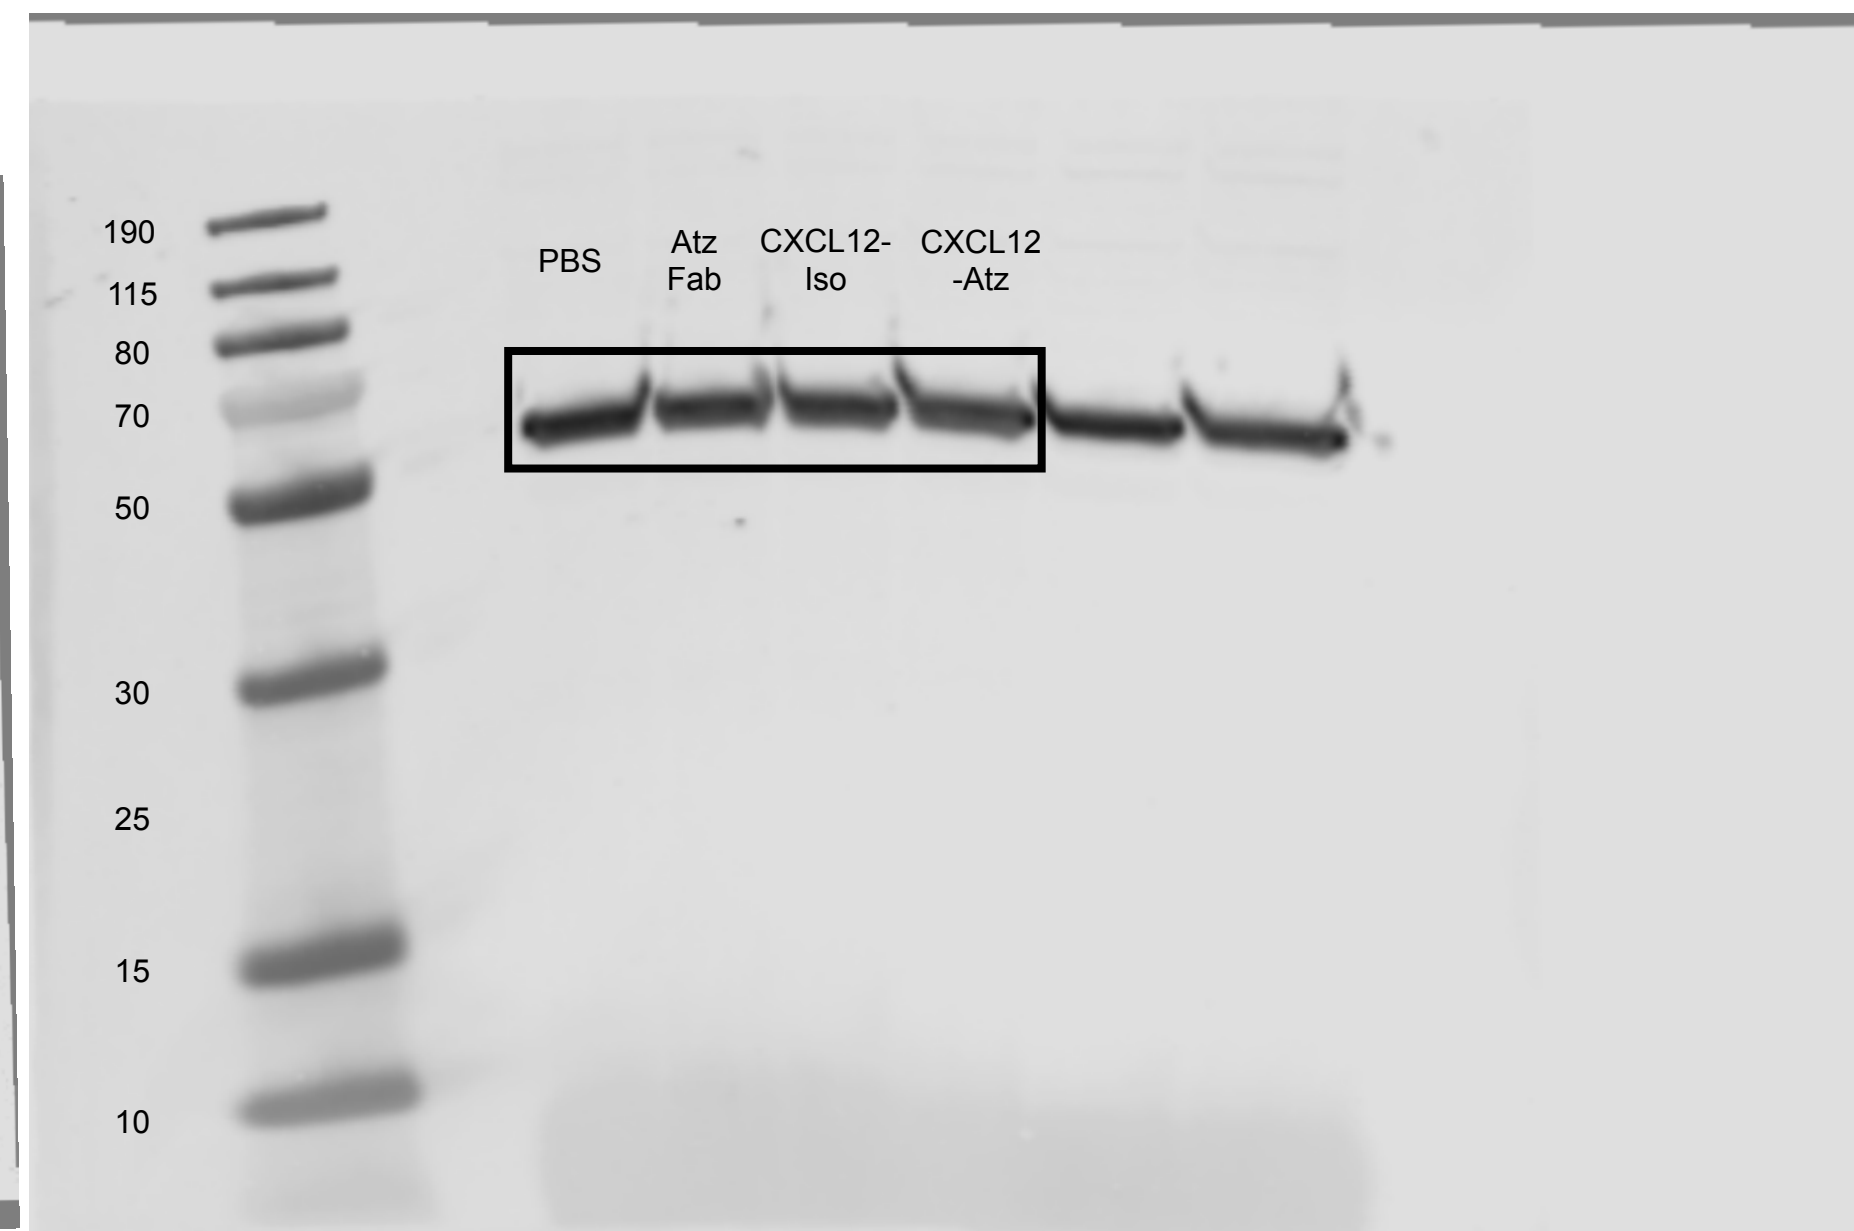

## b. PD-L1 blot

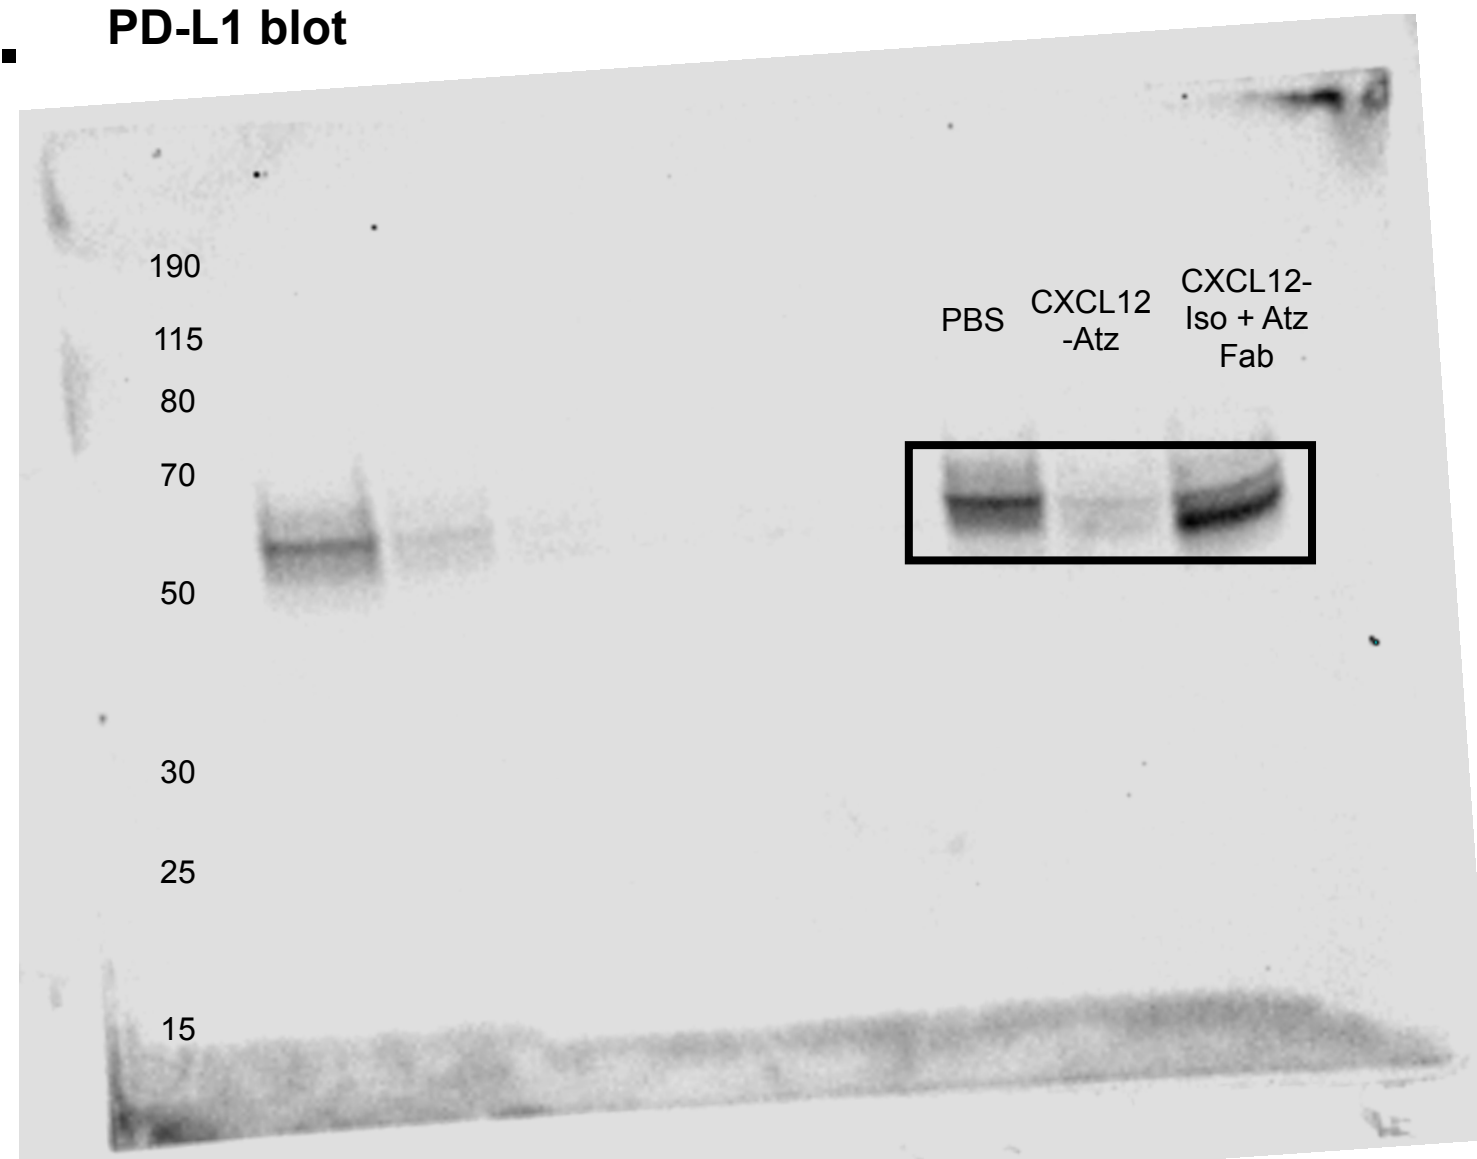

## Tubulin blot

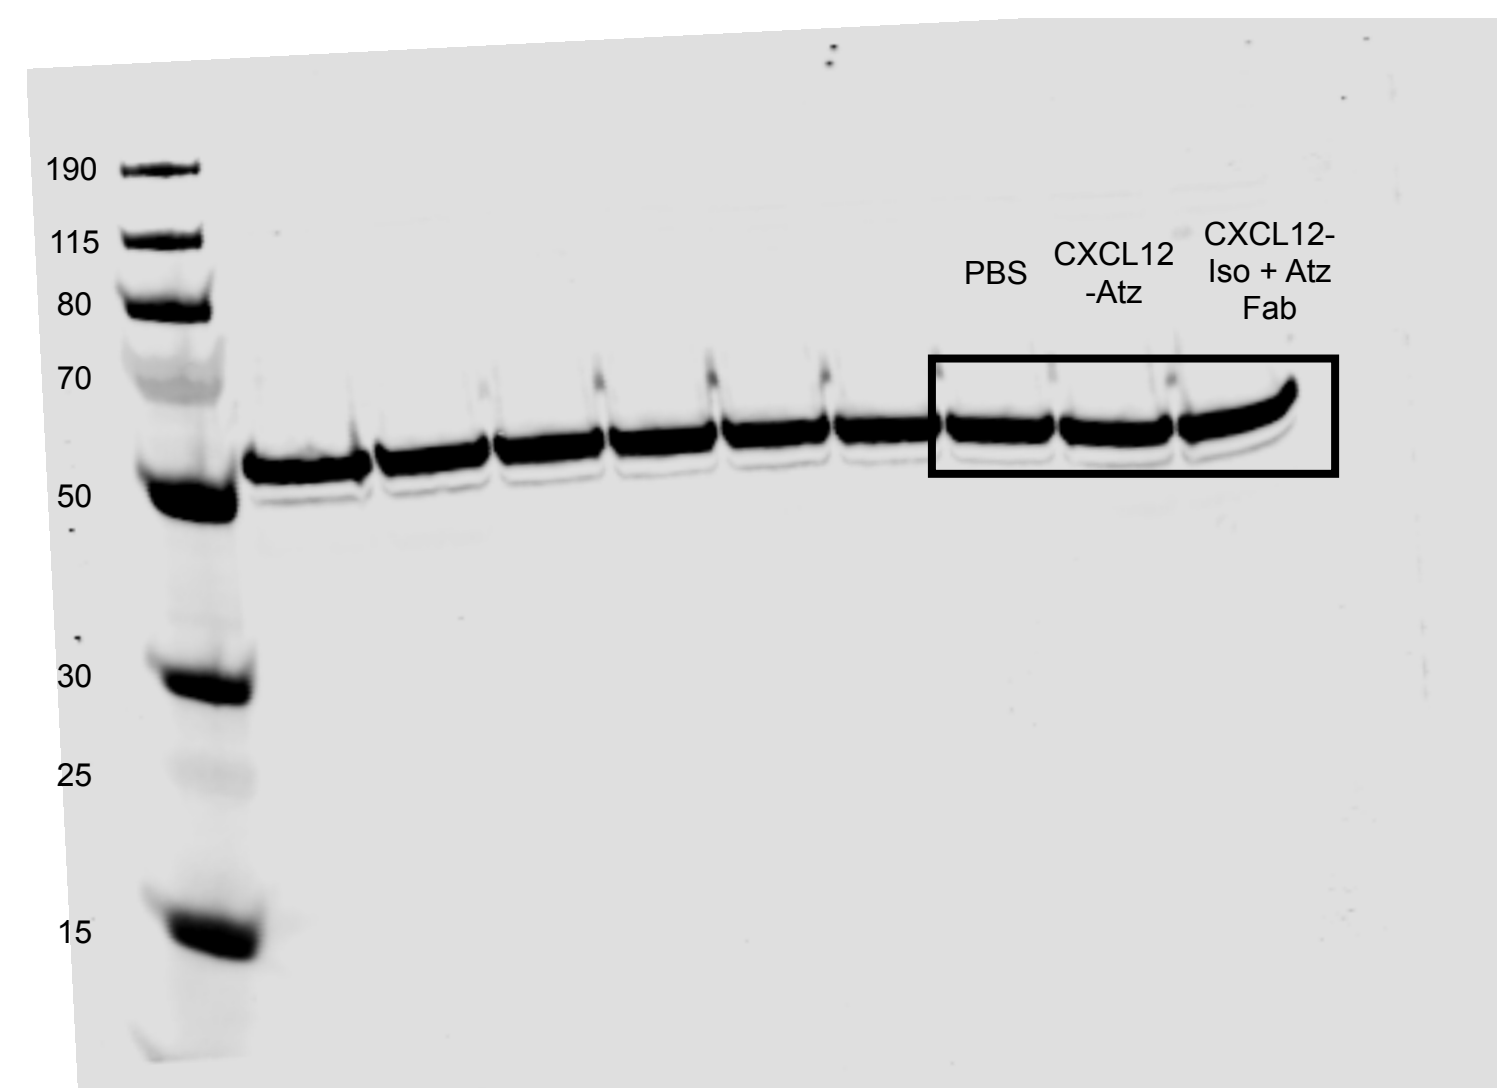

## d. PD-L1 blot

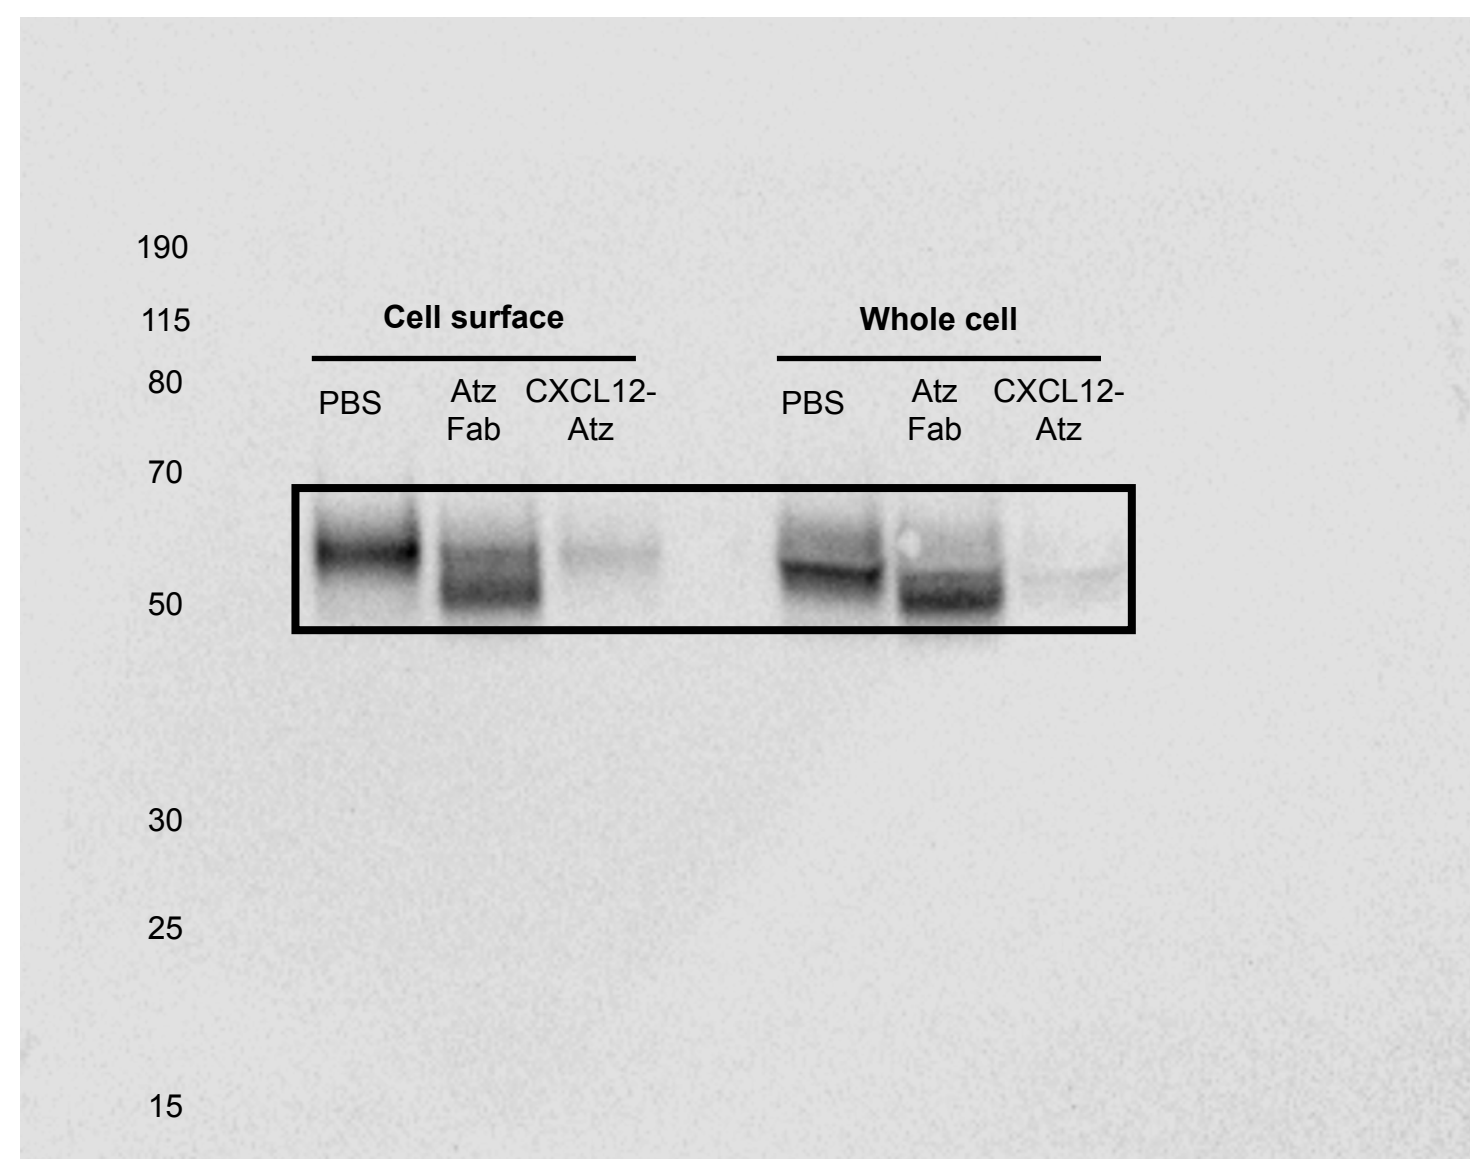

## Whole proteome blot

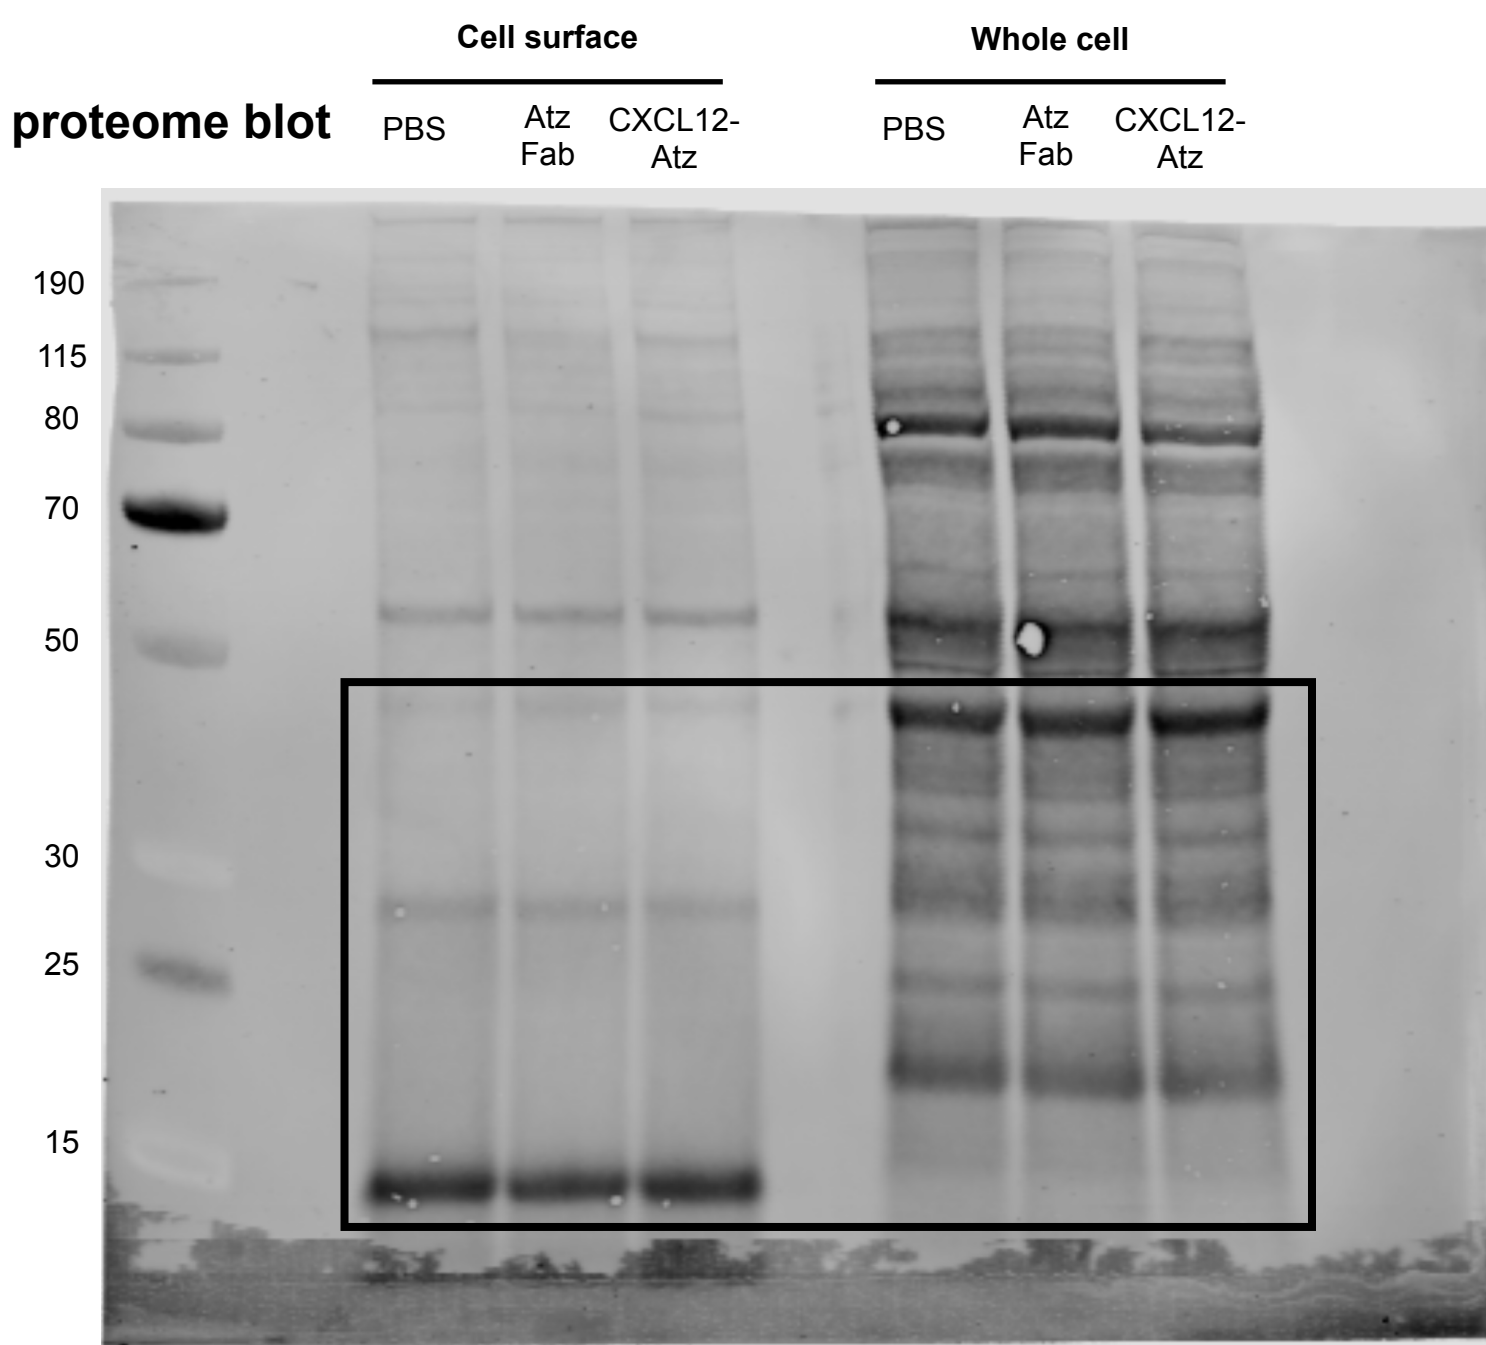

# Extended Data Figure 1

## e. PD-L1 blot

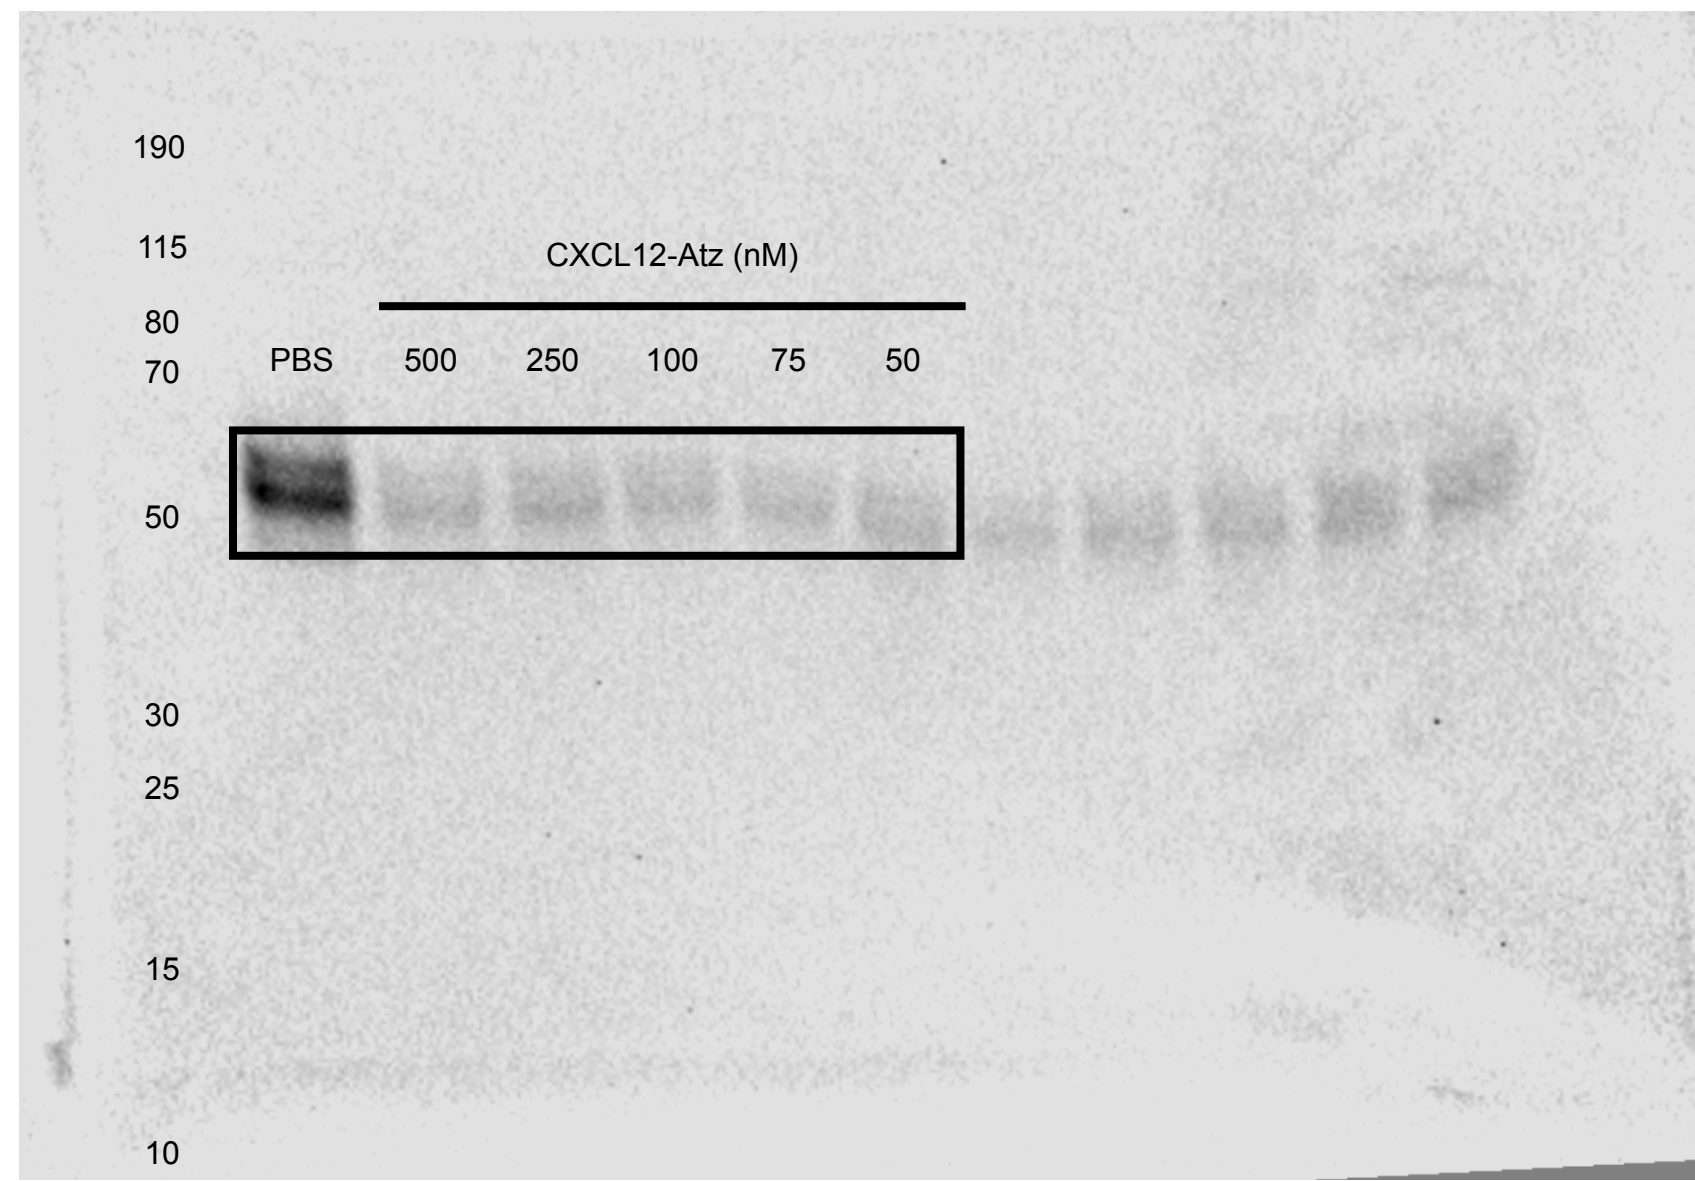

## Tubulin blot

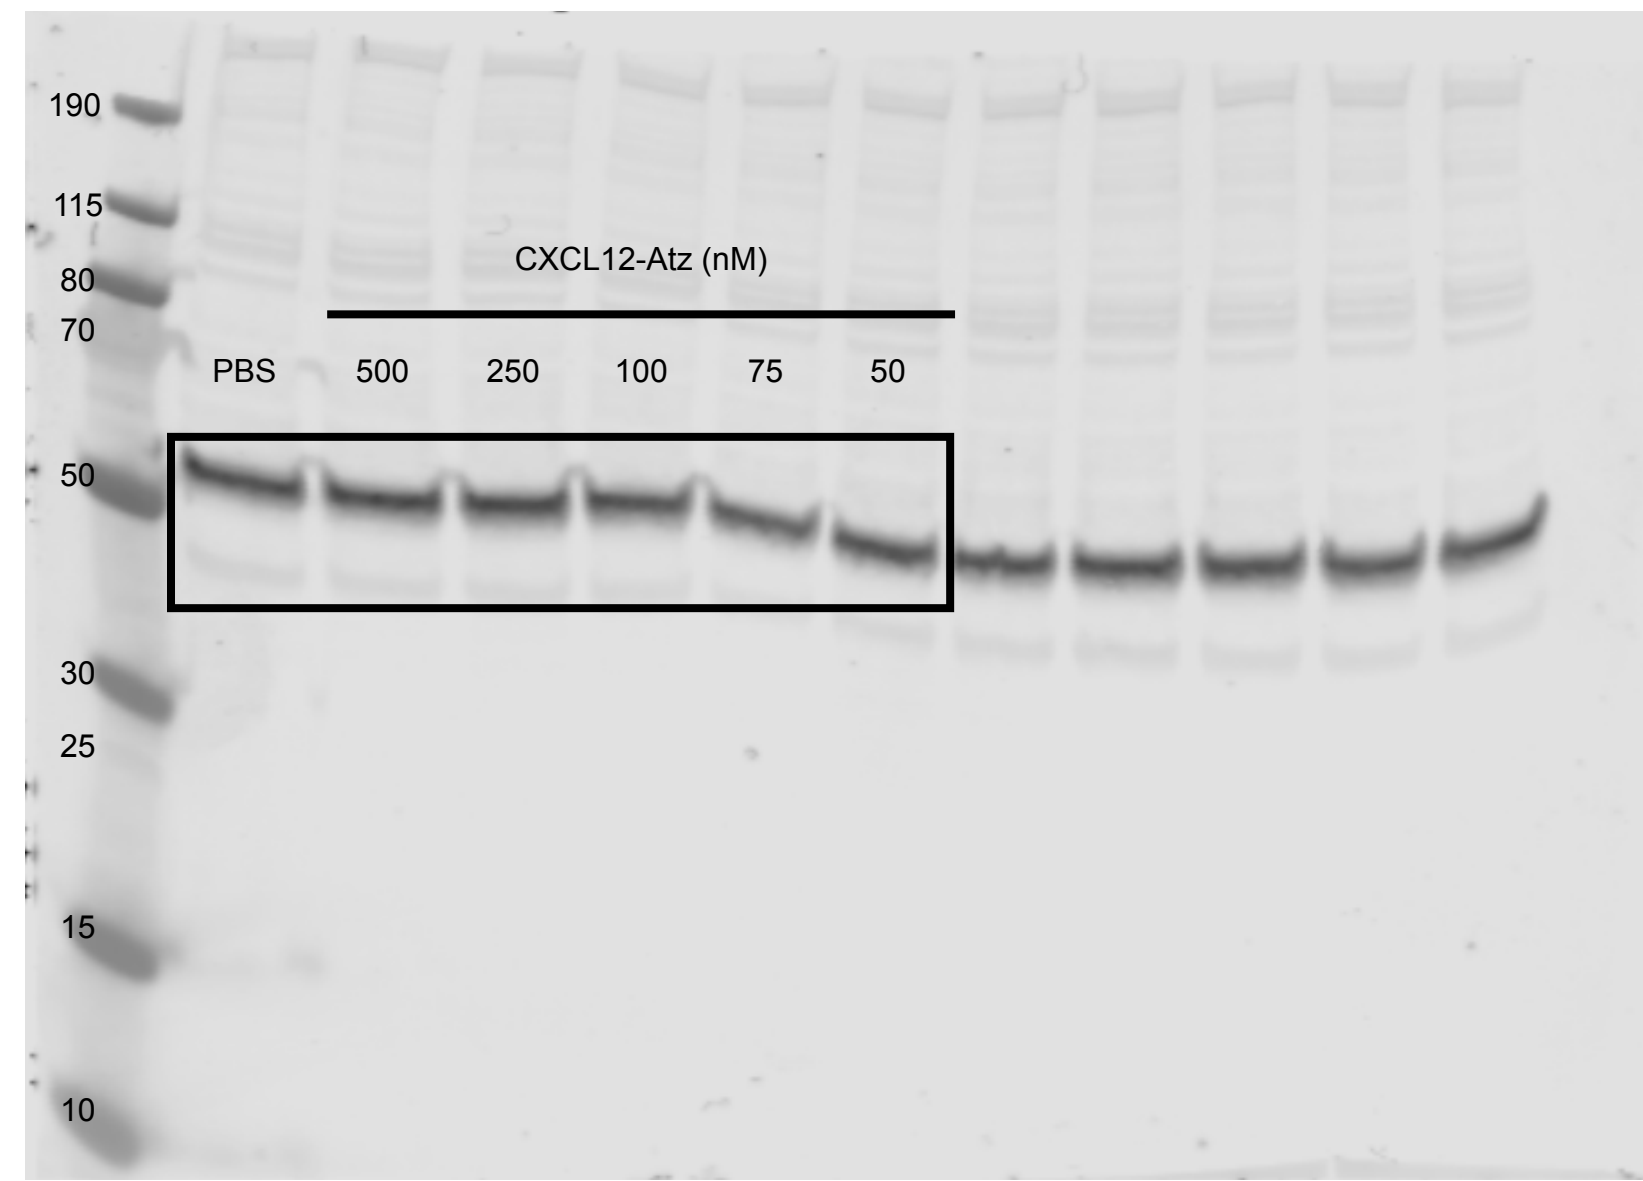

Supplement: 41587_2022_1456_MOESM12_ESM.pdf [file 41587_2022_1456_MOESM12_ESM.pdf]
