# Supplementary material for: Modular cytokine receptor-targeting chimeras for targeted degradation of cell surface and extracellular proteins
Source: PubMed Central journal article supplement (PMC9931583; doi:10.1038/s41587-022-01456-2), 2022-09-22

# Extended Data Figure 2

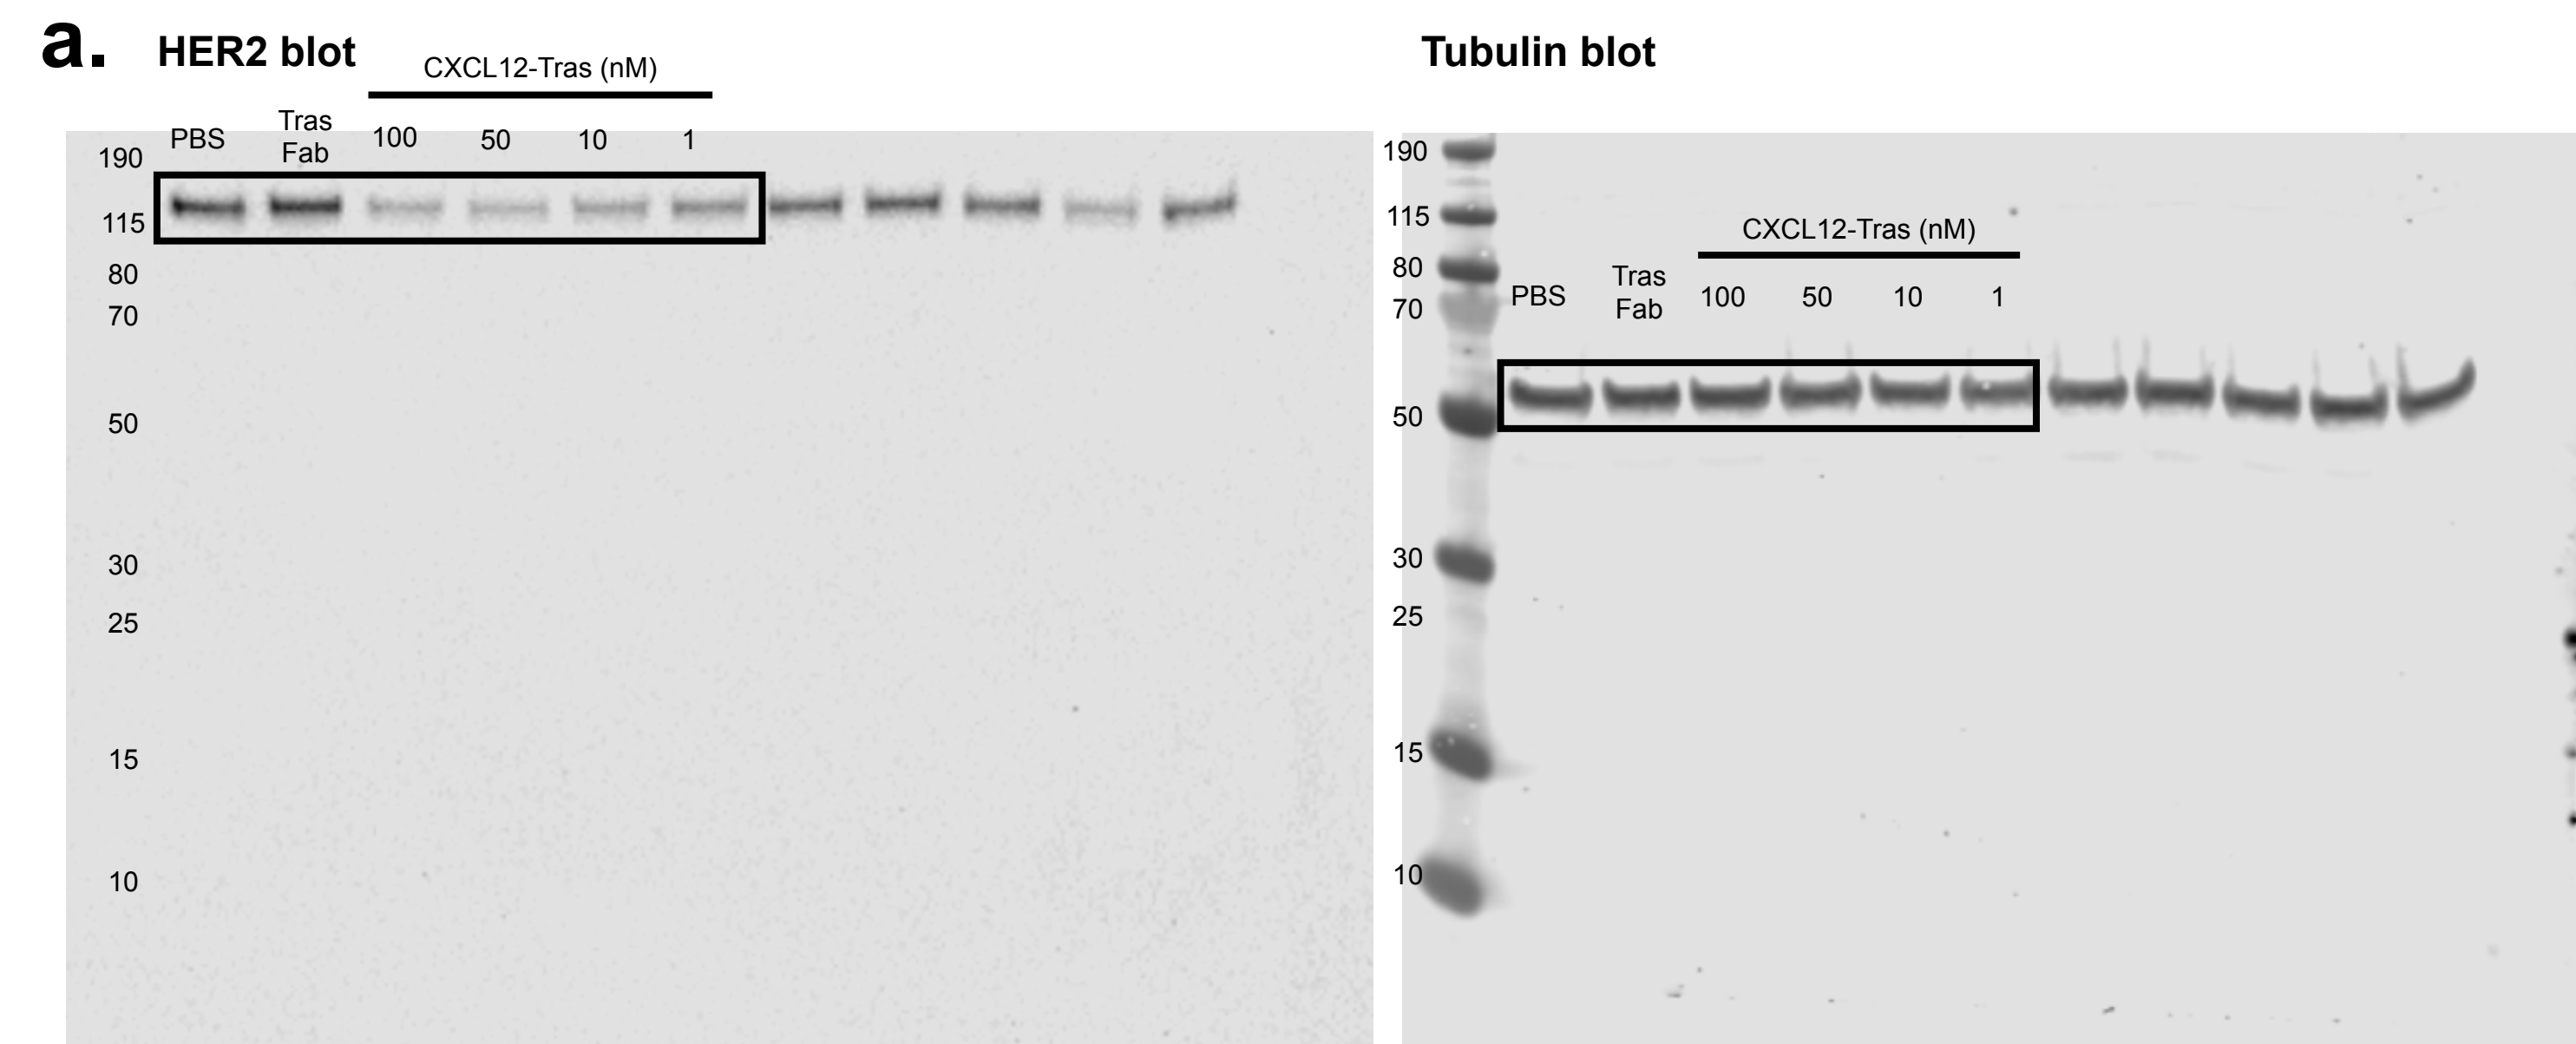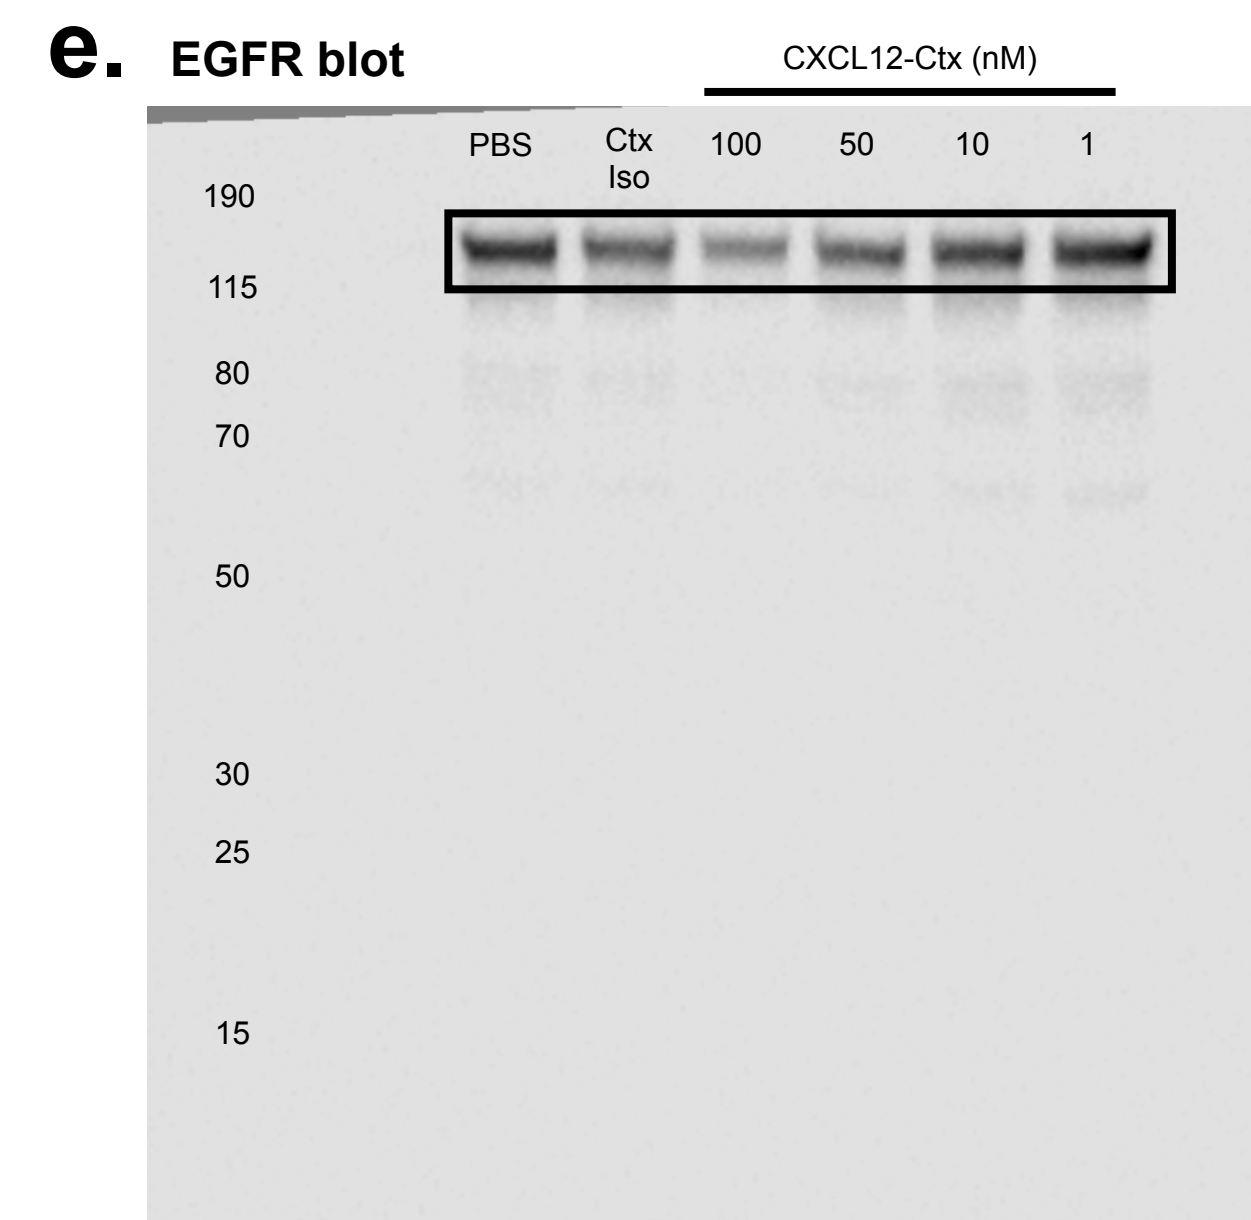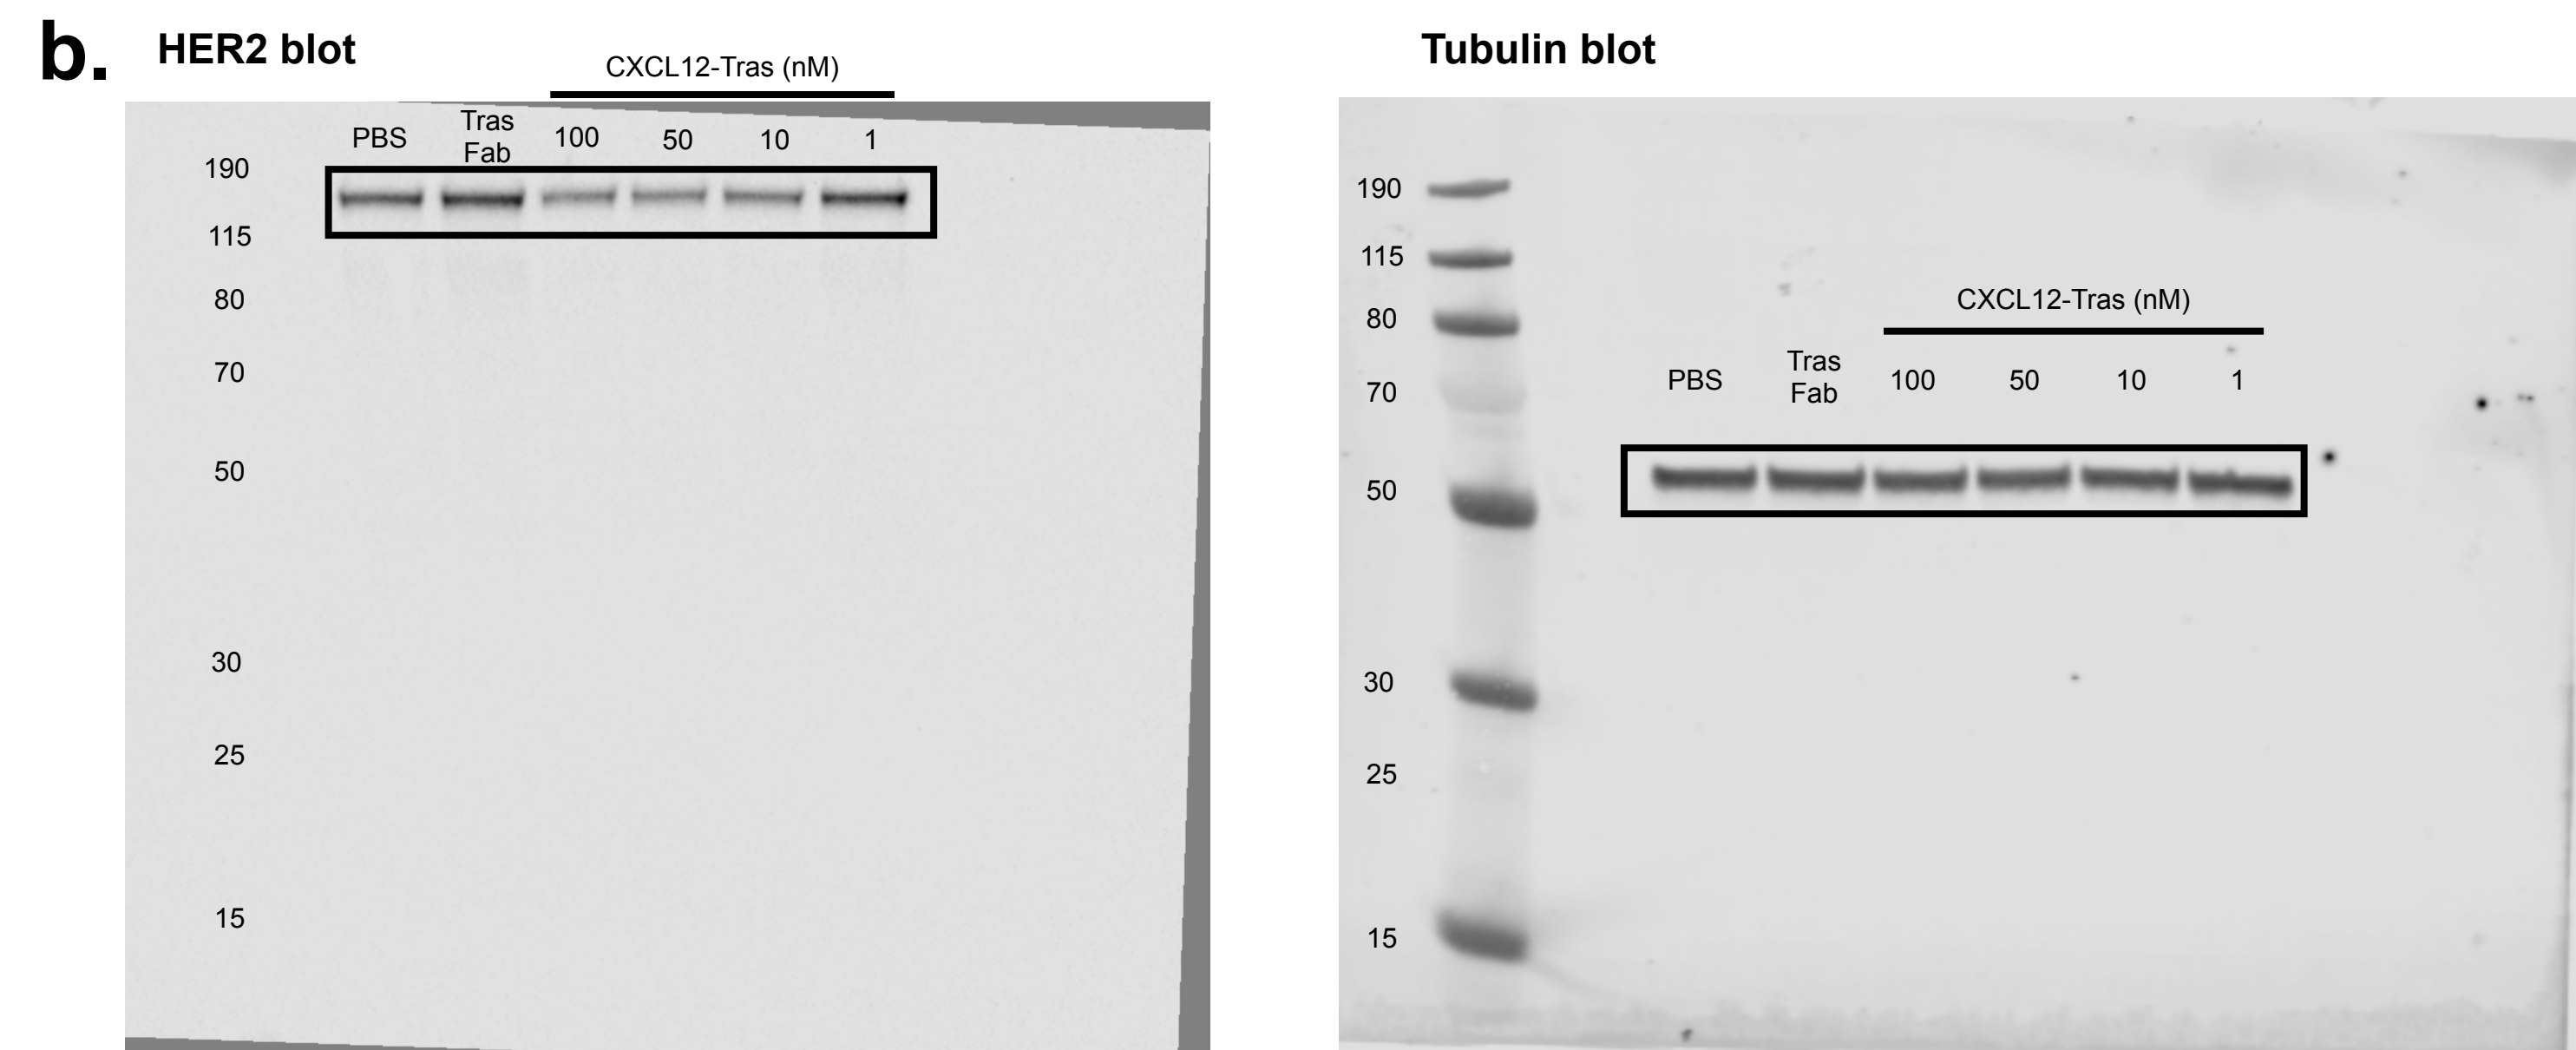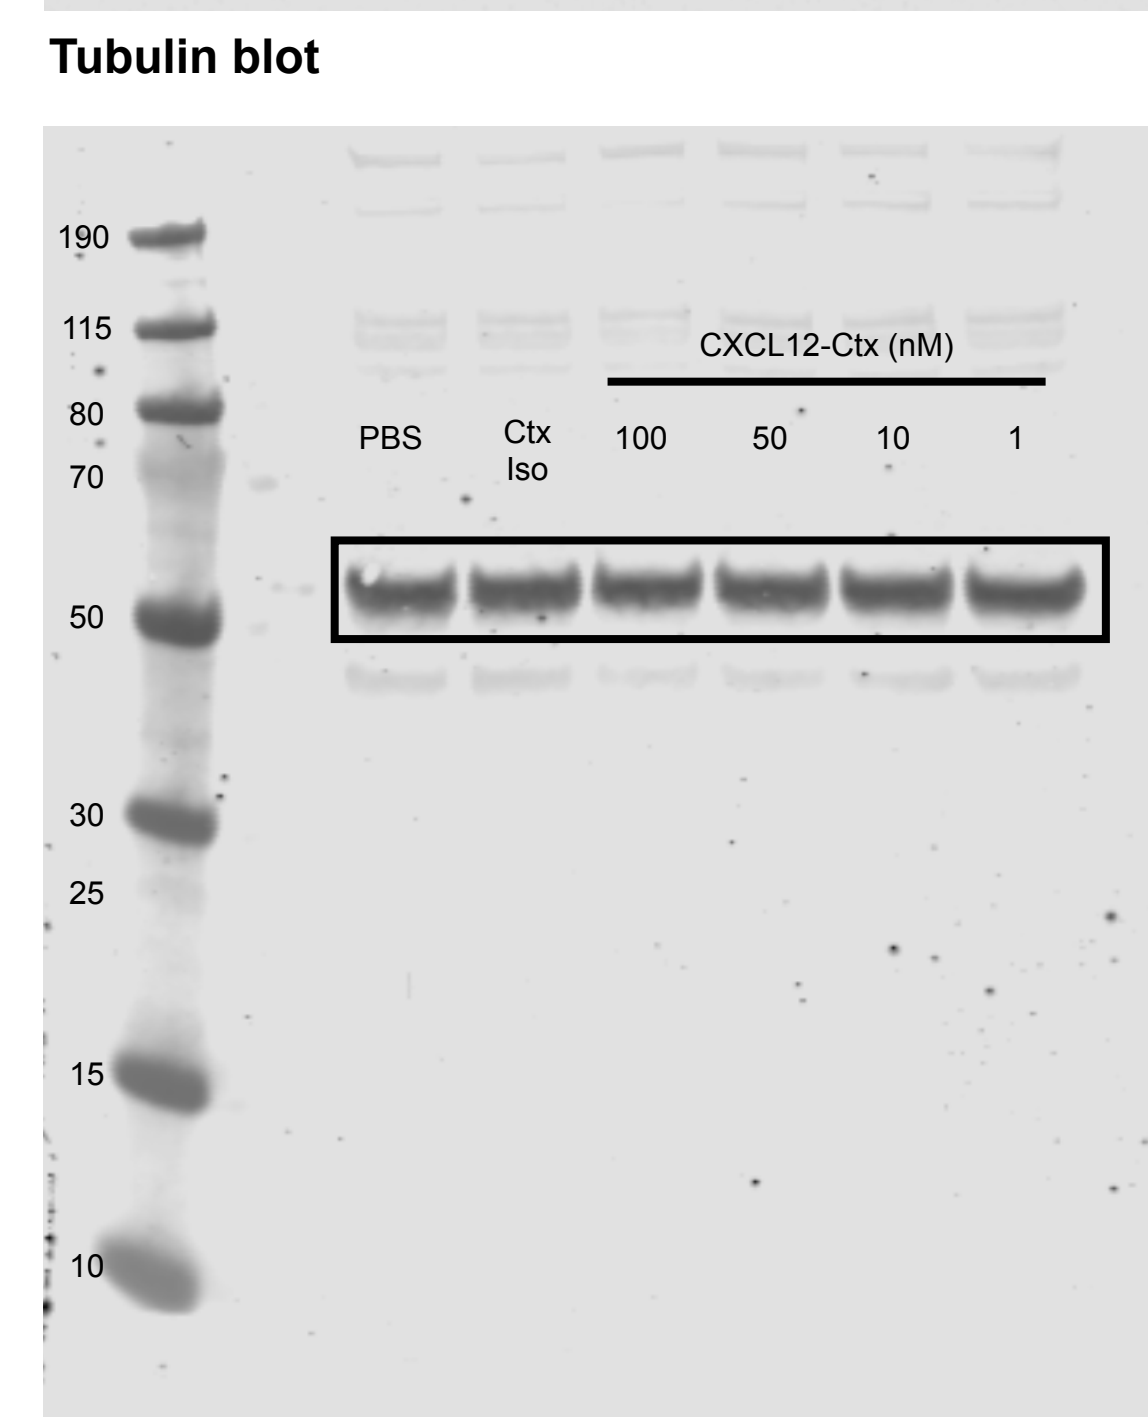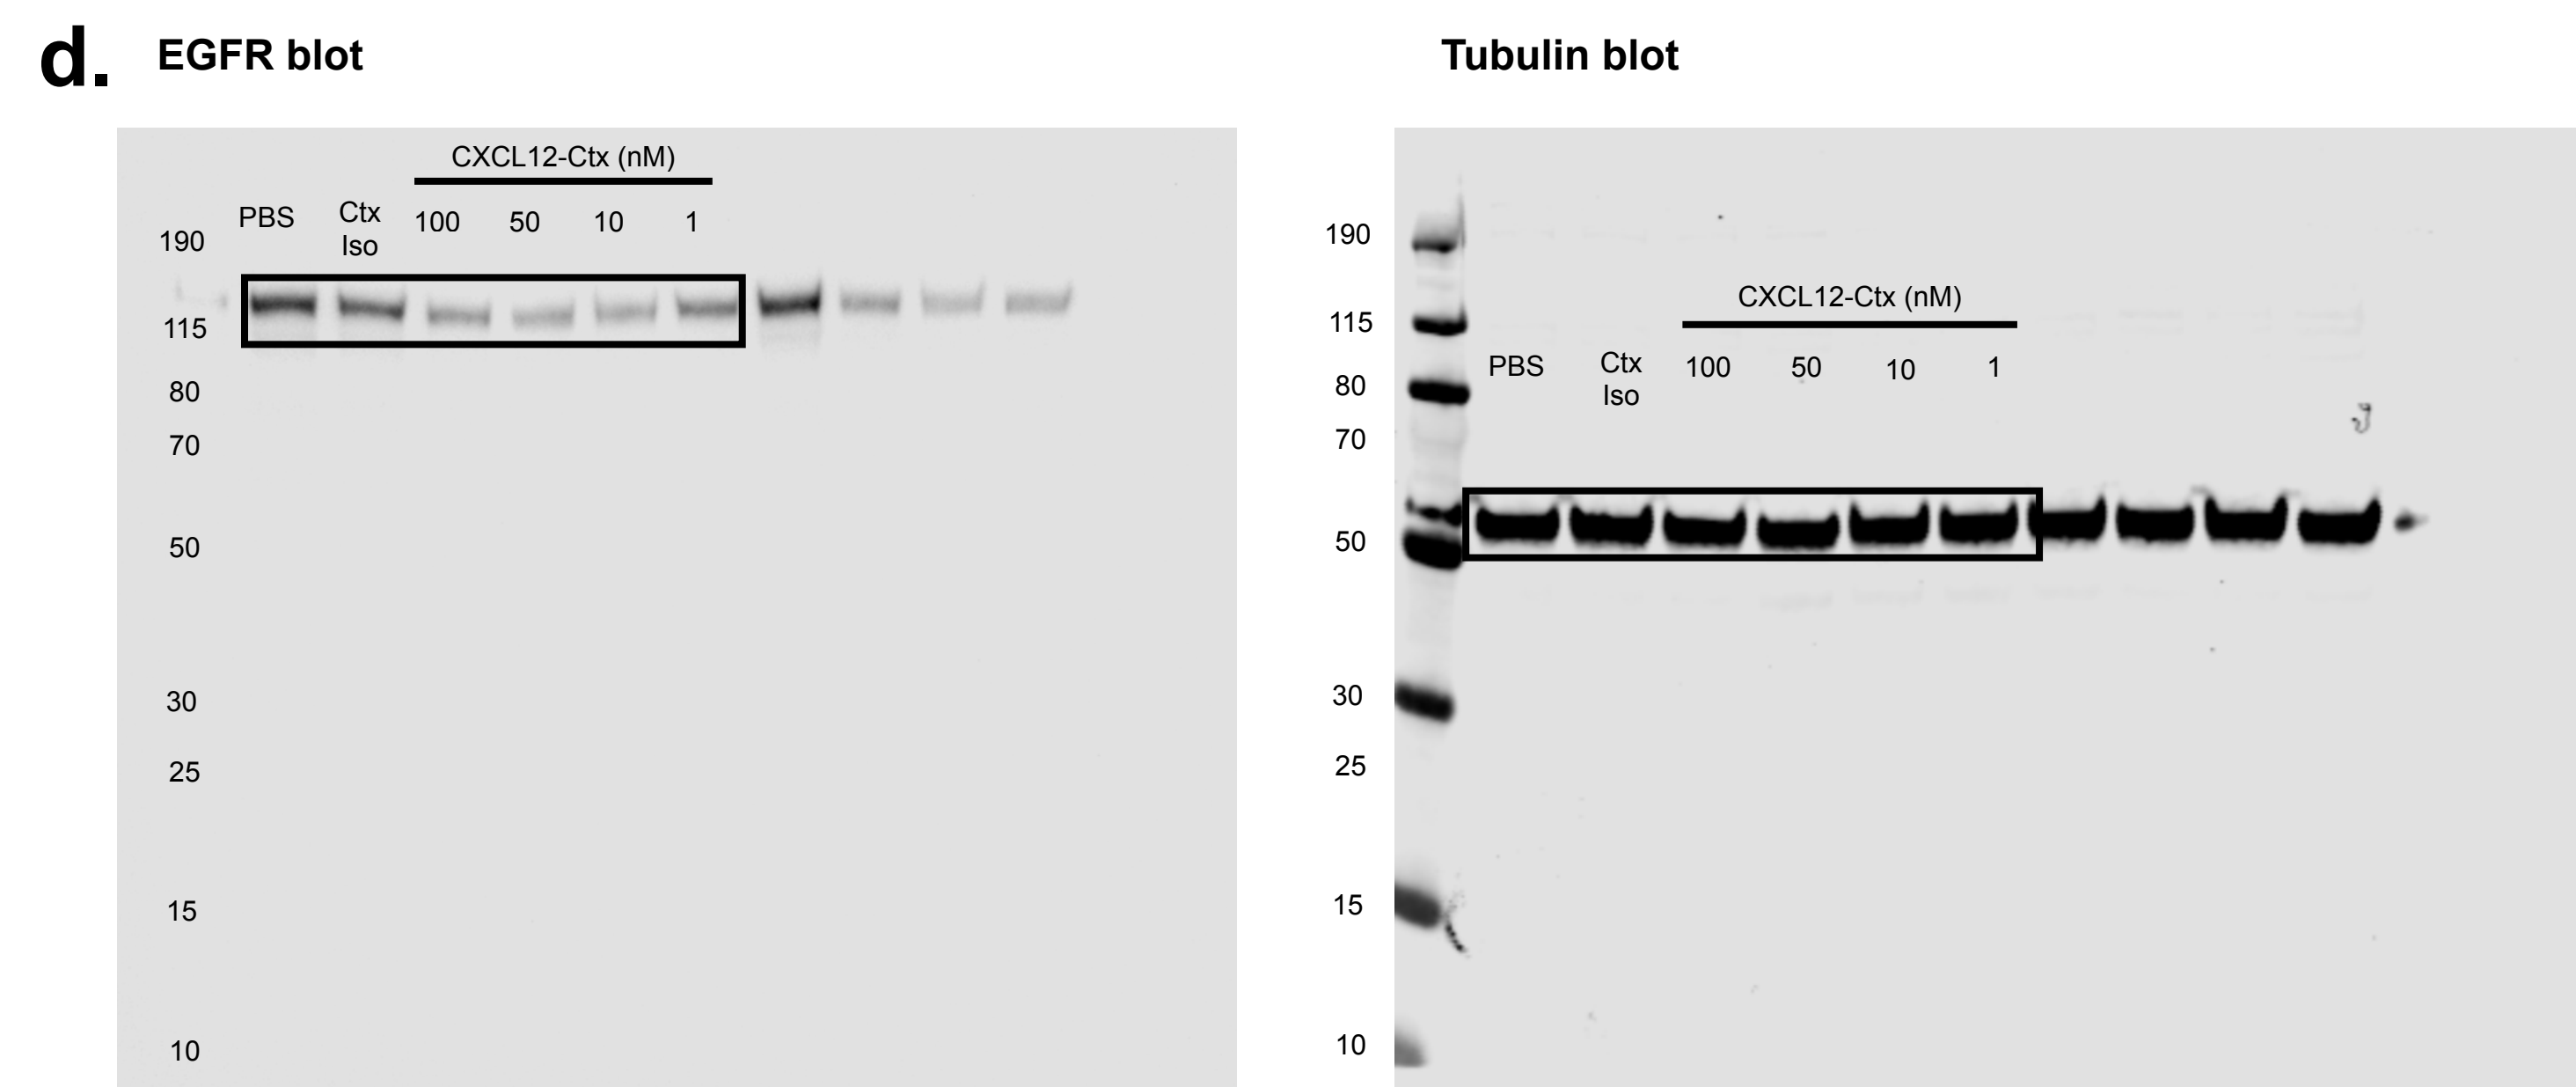

# Extended Data Figure 2

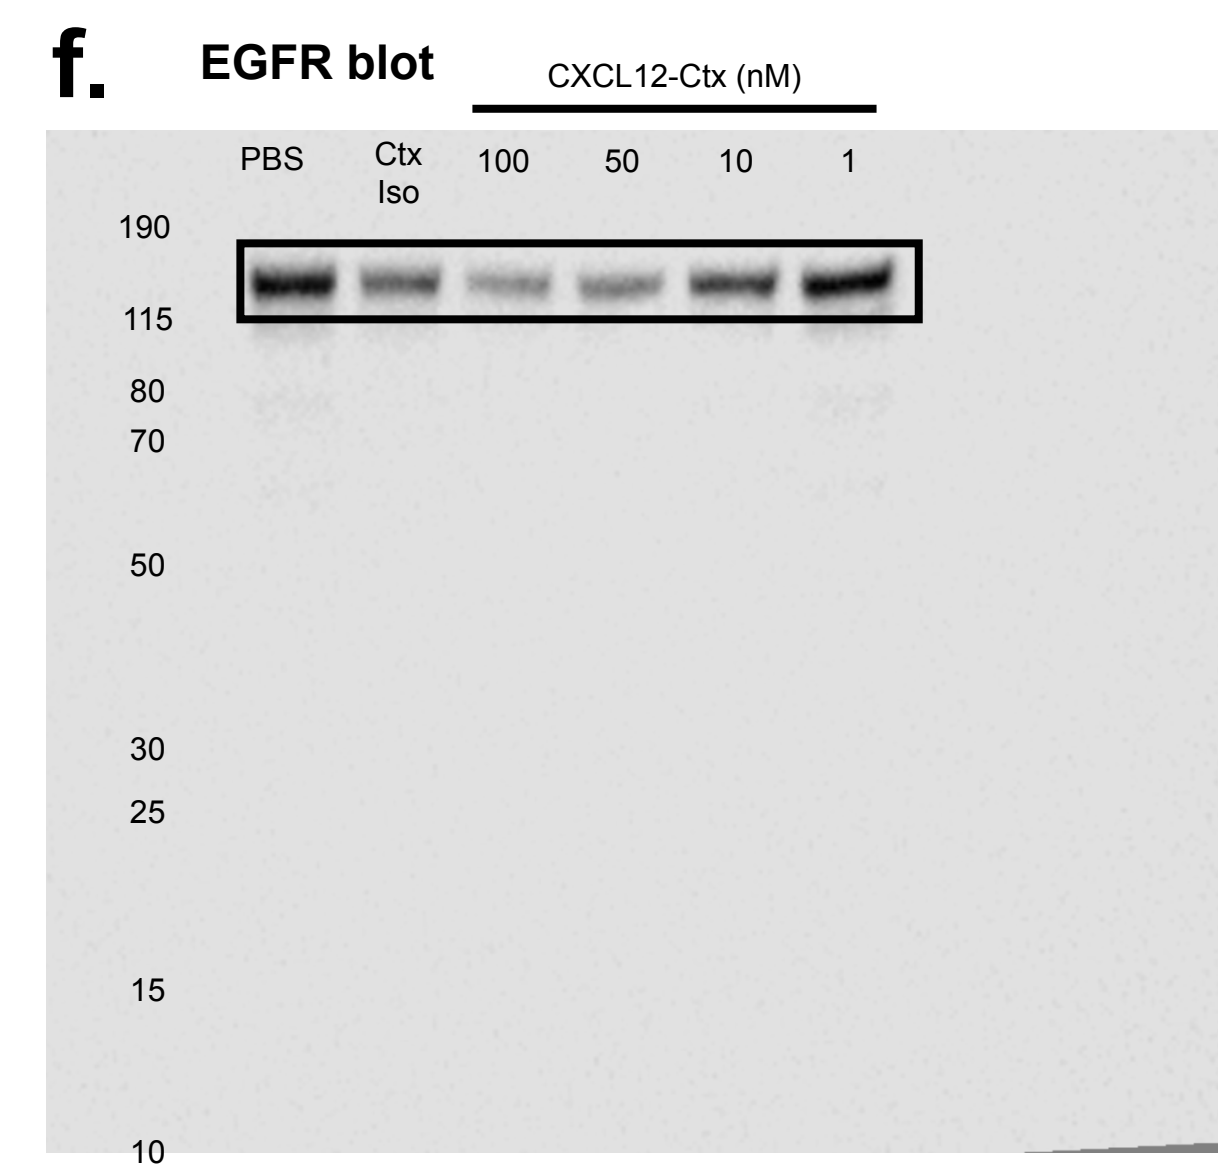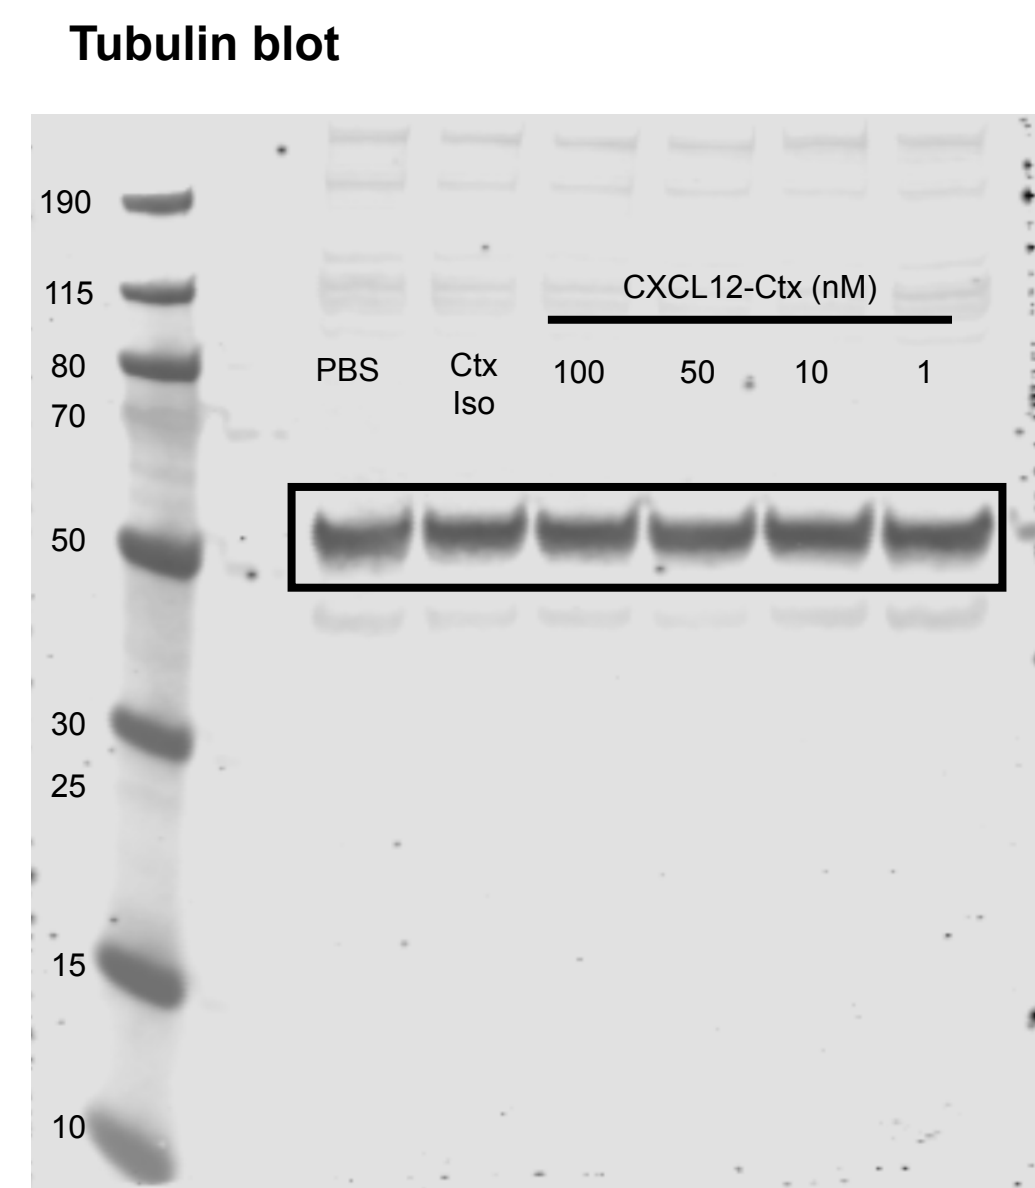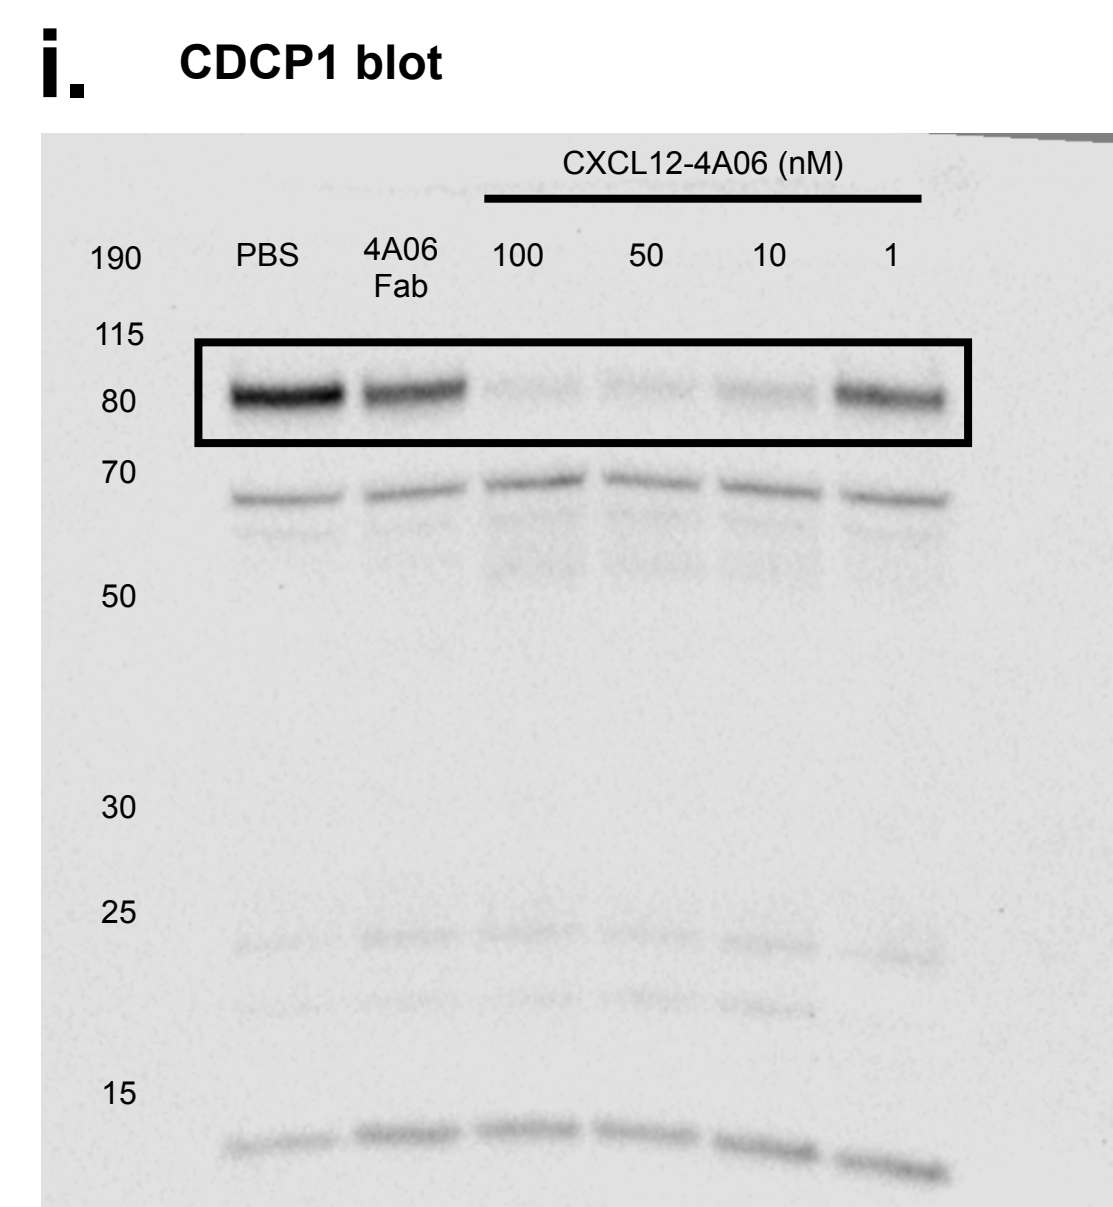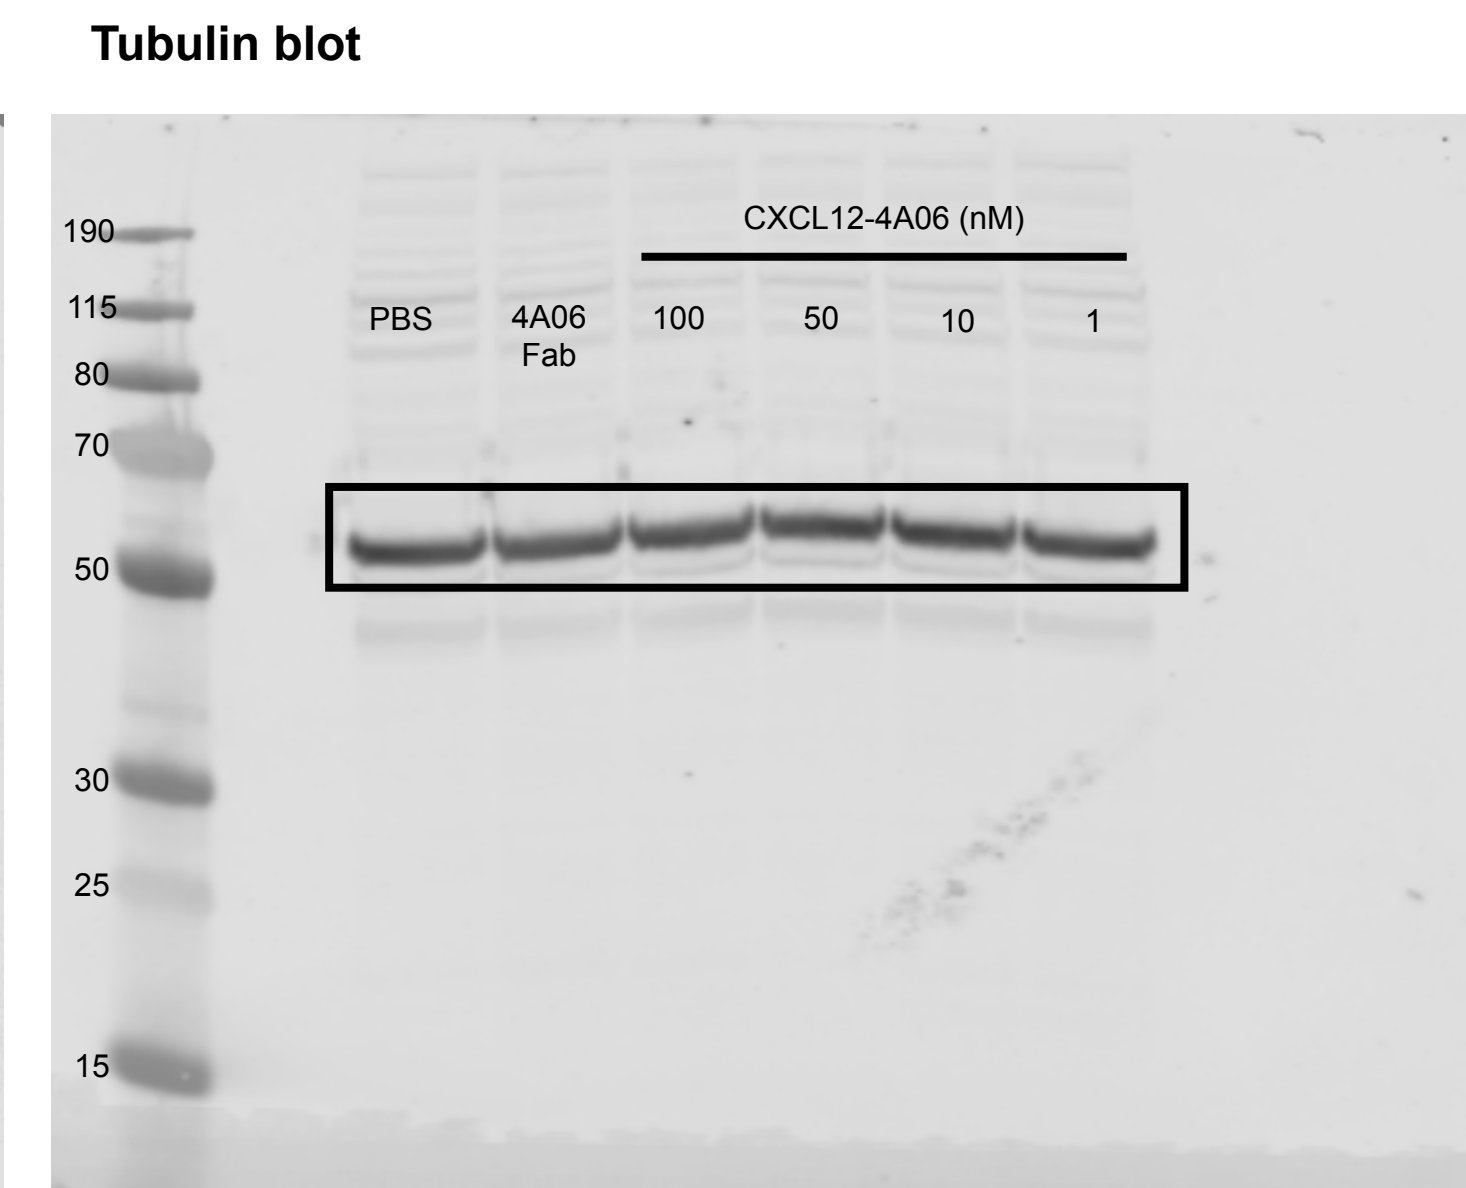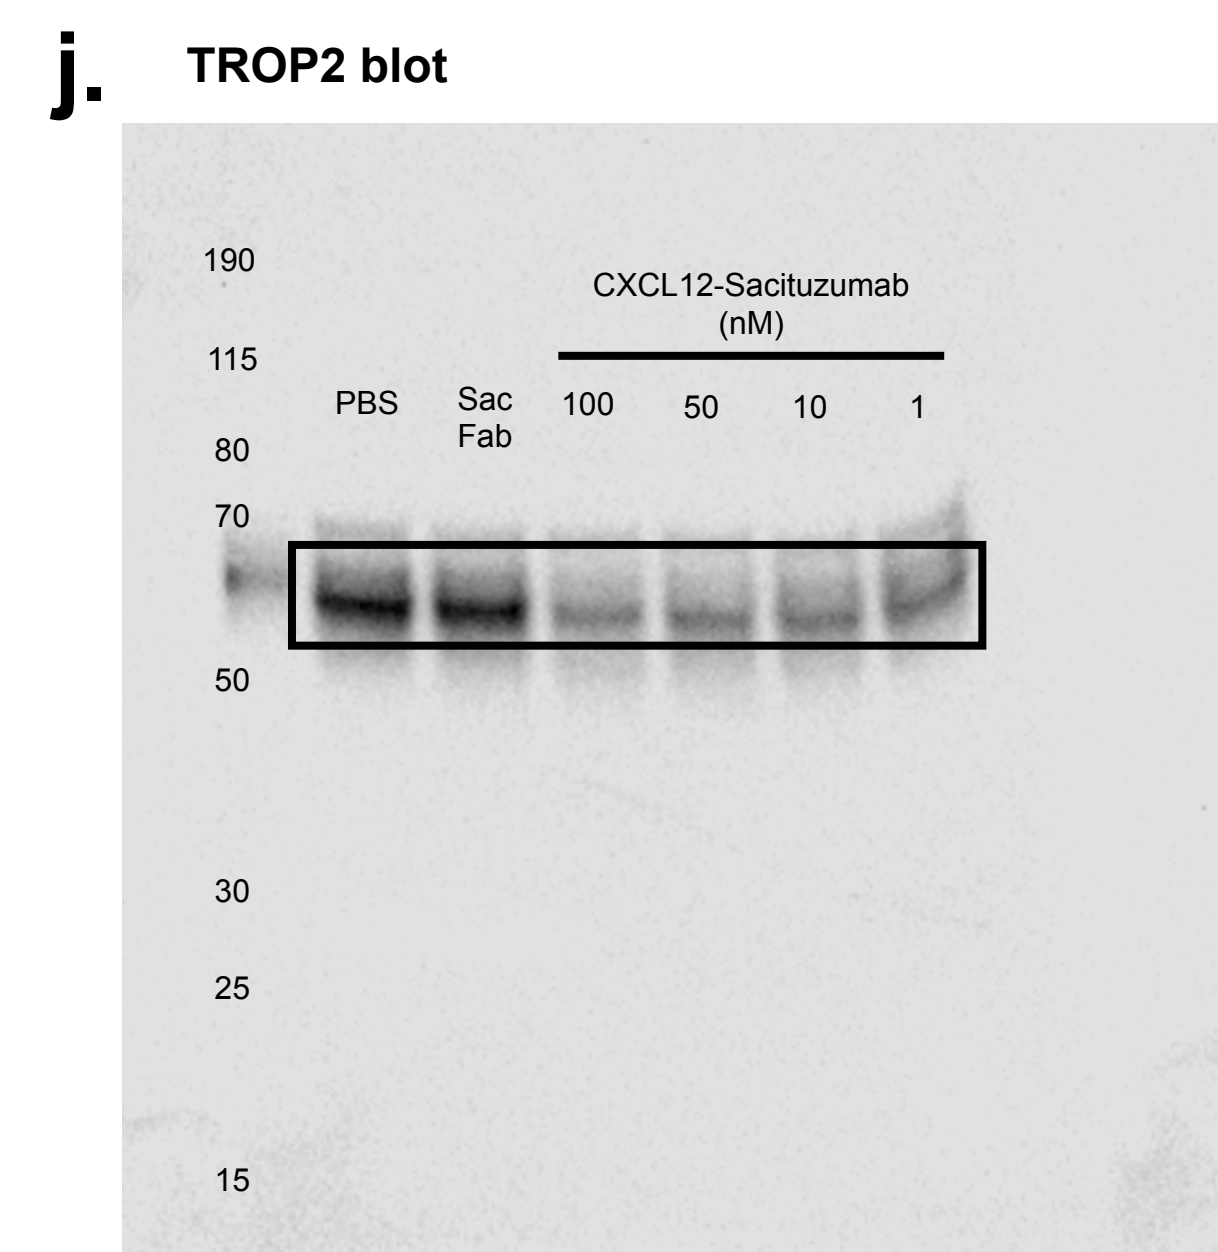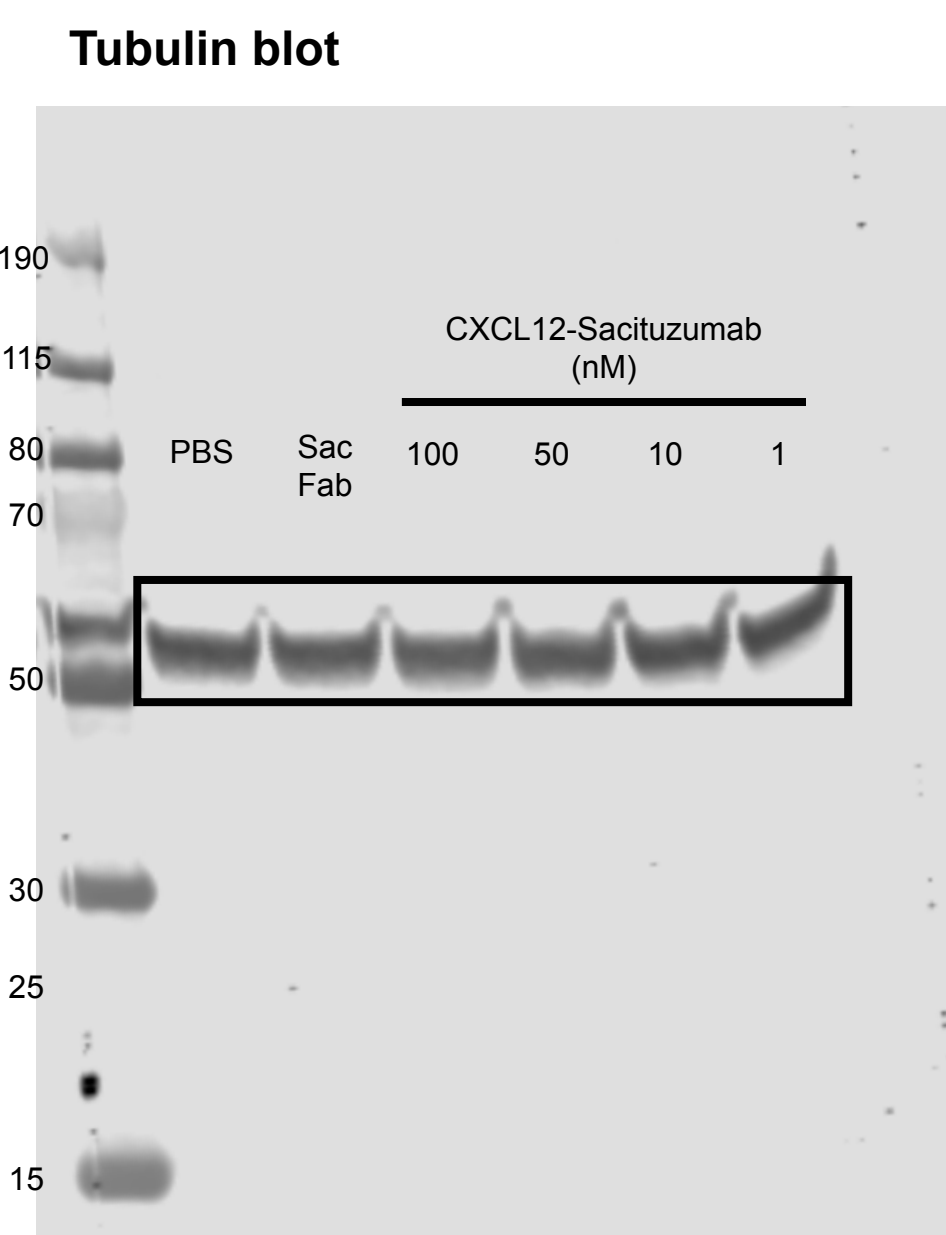

Supplement: 41587_2022_1456_MOESM14_ESM.pdf [file 41587_2022_1456_MOESM14_ESM.pdf]
